# Supplementary material for: The Antarctic Ice Core Chronology 2023 (AICC2023) chronological framework and associated timescale for the European Project for Ice Coring in Antarctica (EPICA) Dome C ice core
Source: Copernicus journal article supplement (doi:10.5194/cp-19-2257-2023), 2023-11-10
Supplement: Supplementary file 1 [file cp-19-2257-2023-supplement.pdf]

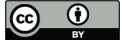

*Supplement of*

**The Antarctic Ice Core Chronology 2023 (AICC2023)  
chronological framework and associated timescale  
for the European Project for Ice Coring  
in Antarctica (EPICA) Dome C ice core**

**Marie Bouchet et al.**

*Correspondence to:* Marie Bouchet ([marie.bouchet@lsce.ipsl.fr](mailto:marie.bouchet@lsce.ipsl.fr))

The copyright of individual parts of the supplement might differ from the article licence.

# 1 Supplementary Material

## 2 1. Study of the gas loss effect for the EDC $\delta\text{O}_2/\text{N}_2$ data

3 The EDC  $\delta\text{O}_2/\text{N}_2$  data have been obtained from several measurement campaigns over the period 2005-2022 at  
4 LSCE. We detail in Table S1 the different conditions of storage and measurements of the series.

5 **Table S1. Series of  $\delta\text{O}_2/\text{N}_2$  obtained on the EDC ice cores with details on the storage and conditions of preparation.**

| Age range<br>(AICC2012, ice age, ka<br>BP)                                                       | Date of<br>measurements | Bubbly or<br>clathrate ice           | Storage<br>temperature<br>since drilling | Analytical<br>method                        | Reference                |
|--------------------------------------------------------------------------------------------------|-------------------------|--------------------------------------|------------------------------------------|---------------------------------------------|--------------------------|
| 11.3 – 27.06                                                                                     | 2006                    | Bubbly and<br>bubble to<br>clathrate | -20°C                                    | Automated melt<br>extraction line           | This study               |
| 4.05 – 11.89 & 27.82 –<br>44.91                                                                  | 2008                    | Bubbly and<br>bubble to<br>clathrate | -20°C                                    | Automated melt<br>extraction line           | This study               |
| 100.162 – 116.238                                                                                | 2010                    | Clathrate                            | -20°C                                    | Automated melt<br>extraction line           | This study               |
| 121.19 – 151.32 & 237.7<br>– 260.27                                                              | 2007                    | Clathrate                            | -20°C                                    | Manual extraction<br>line                   | This study               |
| 157.56 – 208.66                                                                                  | 2017                    | Clathrate                            | -20°C                                    | Automated melt<br>extraction line           | This study               |
| 193.14 – 229.19                                                                                  | 2022                    | Clathrate                            | -20°C                                    | Automated melt<br>extraction line           | This study               |
| 302.32 – 800                                                                                     | 2005                    | Clathrate                            | -20°C                                    | Manual extraction<br>line (LSCE)            | Landais et<br>al. (2012) |
| 459.77 – 800                                                                                     | 2006                    | Clathrate                            | -20°C                                    | Manual extraction<br>line (LSCE)            | Landais et<br>al. (2012) |
| 392.49 – 473.31                                                                                  | 2007                    | Clathrate                            | -50°C                                    | Manual extraction<br>line (LSCE)            | Landais et<br>al. (2012) |
| 700 – 800                                                                                        | 2008                    | Clathrate                            | -50°C                                    | Automated melt<br>extraction line<br>(LSCE) | Landais et<br>al. (2012) |
| 103.75 – 136.47 & 338.25<br>– 700                                                                | 2012                    | Clathrate                            | -50°C                                    | Automated melt<br>extraction line<br>(LSCE) | Bazin et al.<br>(2016)   |
| 138.76 – 332.03                                                                                  | 2016                    | Clathrate                            | -50°C                                    | Automated melt<br>extraction line<br>(LSCE) | Extier et al.<br>(2018b) |
| 111.39 – 148.85 & 180.34<br>– 259.39 & 328.08 –<br>360.59 & 409.29 – 449.61<br>& 486.98 – 539.35 | 2020 - 2022             | Clathrate                            | -50°C                                    | Automated melt<br>extraction line<br>(LSCE) | This study               |

6 A correction has been applied on the datasets obtained in 2006 and 2007 because they were obtained on a new  
 7 mass spectrometer. We found that the calibration of the  $\delta O_2/N_2$  data at the time has not be done correctly when  
 8 switching from the old to the new mass spectrometer and that a shift of +1.5 ‰ should be applied to the  $\delta O_2/N_2$   
 9 data.

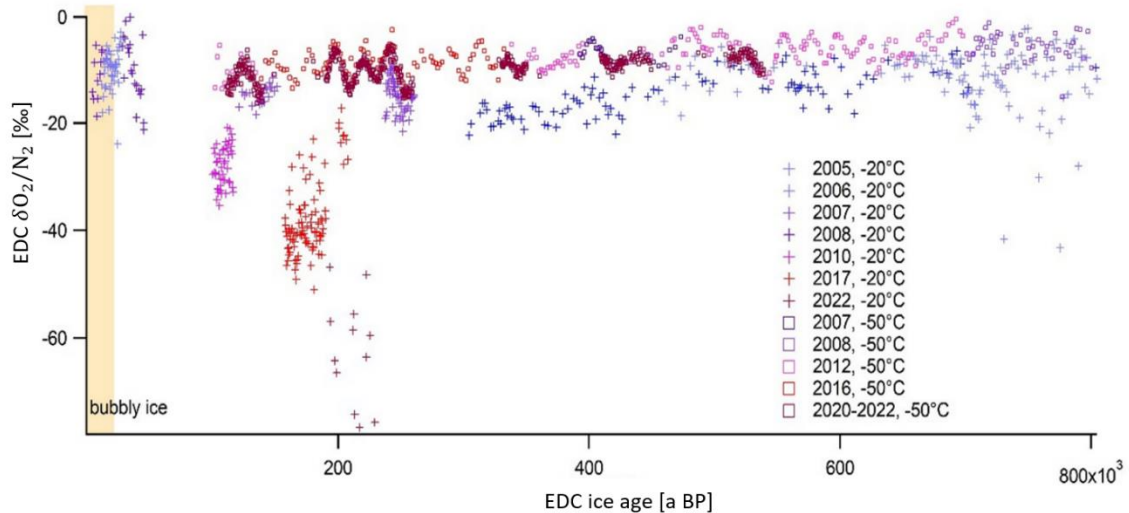

10 **Figure S1.  $\delta O_2/N_2$  series from the EDC ice core after different storage conditions.** Note that the ice quality was very bad  
 11 for the ice samples cut at the bottom of the ice core (corresponding to the age range of 800 – 700 ka BP). The orange rectangle  
 12 frames the zone with only bubbly ice. The years of measurement are indicated and correspond to the different colors of the  
 13 series.

14 Figure S1 shows the evolution of the mean level of  $\delta O_2/N_2$  after different storage conditions. We do not notice  
 15 differences in the  $\delta O_2/N_2$  mean level for the samples stored at  $-50^\circ C$  even after 14 years of storage (2022 vs 2008).  
 16 This result is similar to the one obtained at Dome Fuji by Oyabu et al. (2021) even if we are working with smaller  
 17 sample (20-30 g before removing the outer part). On the contrary, ice storage at  $-20^\circ C$  has a strong effect,  
 18 especially on clathrate ice. The samples analyzed in 2022 after storage at  $-20^\circ C$  during more than 18 years exhibit  
 19  $\delta O_2/N_2$  values as low as -80 ‰. The bubbly ice analyzed here has been stored at  $-20^\circ C$ . The associated mean level  
 20 of  $\delta O_2/N_2$  is not significantly different from the one measured for samples stored at  $-50^\circ C$  but the scattering is  
 21 much larger as already observed on other series from bubbly ice (e.g. Oyabu et al., 2021).

## 22 2. Methods for aligning ice core records to reference curves

23

### 24 2.1 Study of the impact of filtering on $\delta O_2/N_2$ - insolation tie point identification

25 Figure S2 shows the smoothed  $\delta O_2/N_2$  dataset using a low-pass (rejecting periods below 15 kyr) or a band-pass  
 26 filter (keeping periods between 100 and 15 kyr periods, used by Bazin et al., 2013). The choice of filter does not  
 27 alter the peak positions in the  $\delta O_2/N_2$  curve

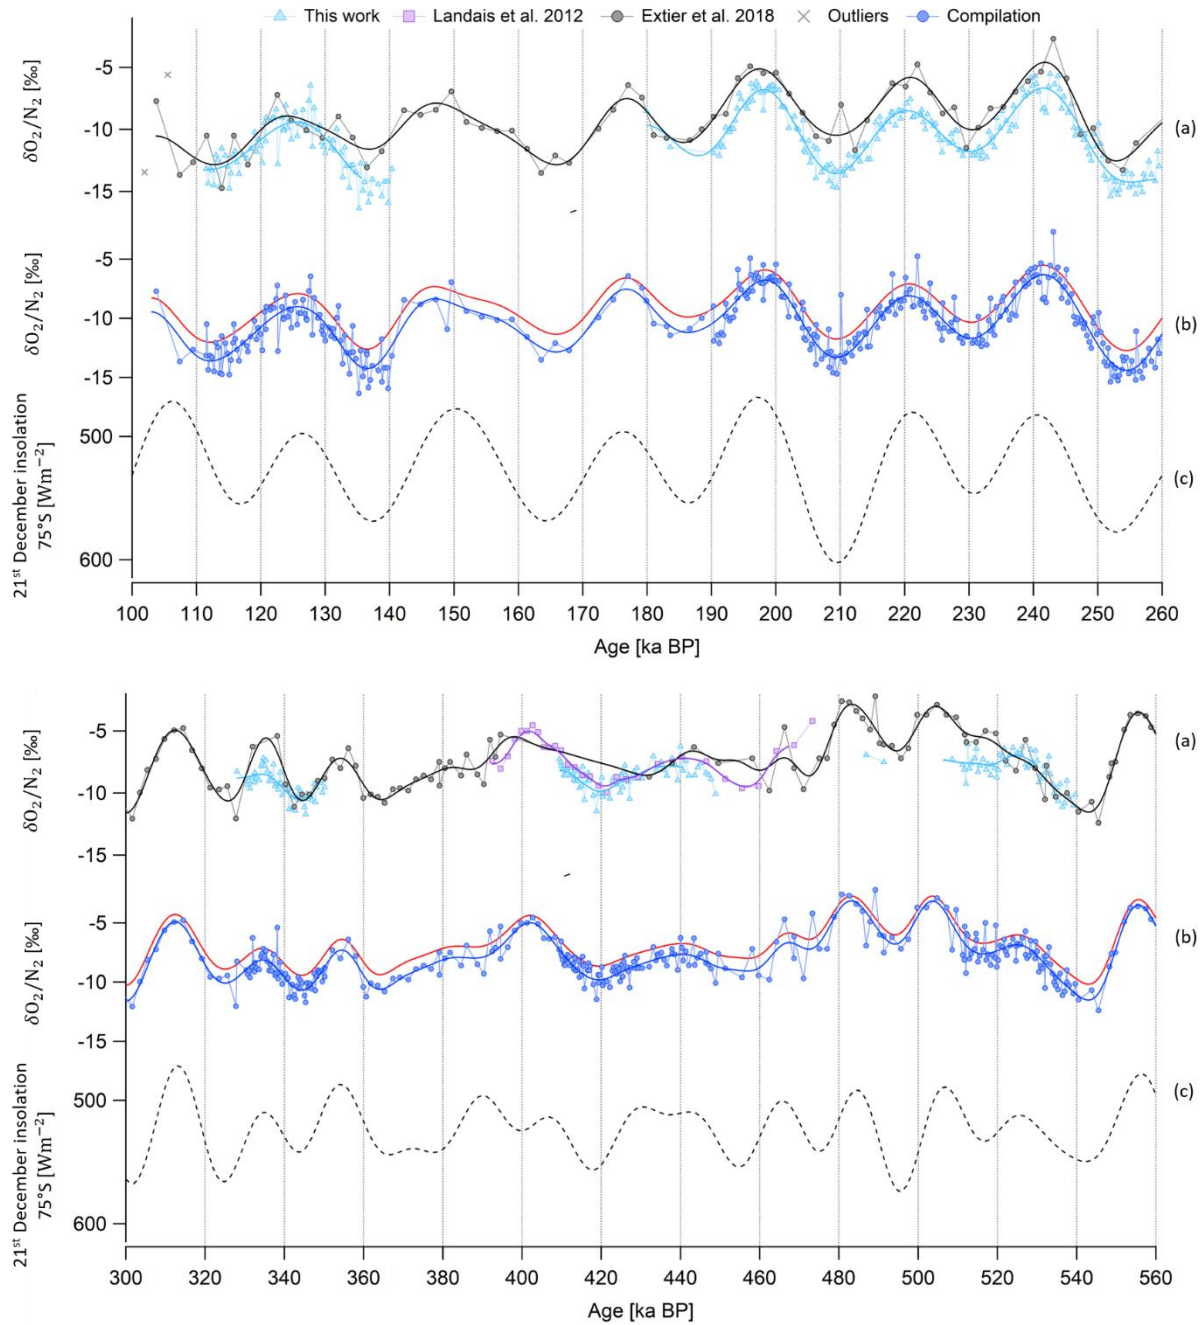

28 **Figure S2. Evolution of EDC  $\delta\text{O}_2/\text{N}_2$  record between 260 and 100 ka BP and between 560 and 300 ka BP.** (a) EDC raw  
 29  $\delta\text{O}_2/\text{N}_2$  old data between 800 and 100 ka BP (black circles for data of Extier et al., 2018b; and purple squares for data of Landais  
 30 et al., 2012), outliers (grey crosses) and low-pass filtered signal (black and purple lines). EDC raw  $\delta\text{O}_2/\text{N}_2$  new data (blue  
 31 triangles, this study) and low-pass filtered signals (blue line). (b) Compilation of the two datasets and low-pass filtered (blue  
 32 line) or band-pass filtered (red line) compiled signal. (c) 21<sup>st</sup> December insolation at 75° S on a reversed axis.

33 We compare tie point identification performed without (method a) and with (method b) filtering of the highly  
 34 resolved  $\delta\text{O}_2/\text{N}_2$  record between 260 and 180 ka BP (Fig. S3). The signal is first interpolated every 100 years. For  
 35 the method a, we identified the mean maximum (or minimum) position  $\text{age}_{\text{max}(i),a}$  (or  $\text{age}_{\text{min}(i),a}$ ) as the middle  
 36 of the age interval  $[x_1; x_2]$  in which  $\delta\text{O}_2/\text{N}_2$  is superior (or inferior) to a certain threshold. The threshold is defined  
 37 as 95 % (or 5 %) of the amplitude difference  $D_i$  between the considered maximum and the minimum immediately  
 38 preceding it (or between the considered minimum and the maximum immediately following it). The process is

39 reiterated every  $\sim 10$  kyr (precession half period) when an extremum is reached in the  $\delta O_2/N_2$  signal. For the  
 40 method b (described in the main text), we detected the peak positions ( $age_{max(i),b}$  and  $age_{min(i),b}$ ) in the  $\delta O_2/N_2$   
 41 via an automated method using the zero values of the time derivatives of the low-pass filtered  $\delta O_2/N_2$  compiled  
 42 signal. After comparison of the peak positions identified by methods a and b (Table S2), we found an average  
 43 disagreement of 700 years, with the largest value, 2150 years, observed between  $age_{min(i+1),b}$  and  $age_{min(i+1),a}$  at  
 44 about 230 ka BP (Fig. S3). This period coincides with abrupt variations in the EDC  $\delta D$  record (Fig. S3), reflecting  
 45 changes in surface climatic conditions which may have impacted high resolution variability of the  $\delta O_2/N_2$  signal  
 46 in addition of the insolation effect. Over periods of lower resolution of the  $\delta O_2/N_2$  signal, the extrema positions  
 47 are not affected by the filtering by more than 600 years (Table S2).

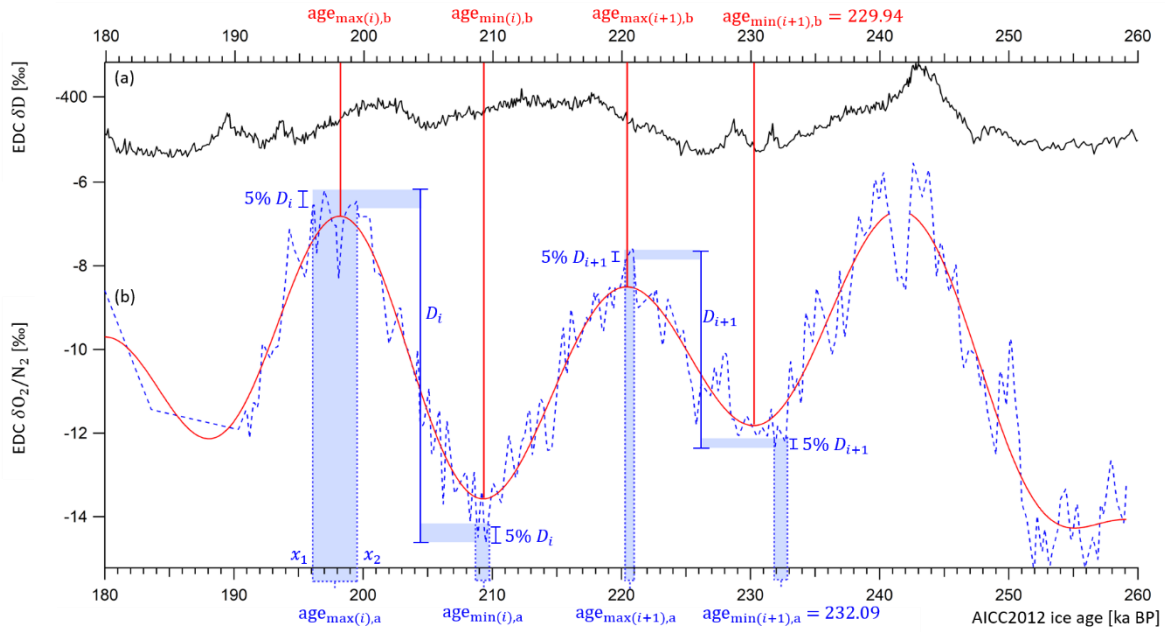

48 **Figure S3. Identification of peaks position in filtered or unfiltered  $\delta O_2/N_2$  record between 260 and 180 ka BP.** (a) EDC  
 49  $\delta D$  (Jouzel et al. 2007). (b) EDC  $\delta O_2/N_2$  (blue dashed curve) and low-pass filtered EDC  $\delta O_2/N_2$  (red curve). Peaks position in  
 50 the  $\delta O_2/N_2$  record is identified as per methods a or b. Following the method a, the maximum position  $age_{max(i),a}$  (on the bottom  
 51 horizontal axis) is the middle of the age interval  $[x_1; x_2]$  (blue vertical rectangles) in which  $\delta O_2/N_2$  values are superior to 95 %  
 52 of the difference  $D_i$  (vertical blue bars). The other peaks position is indicated in a similar way on the bottom horizontal axis.  
 53 Following the method b, the extremum position is given by a 0 value in the temporal derivative of the filtered  $\delta O_2/N_2$  record.  
 54 The peak positions obtained with the method b ( $age_{max(i),b}$ ,  $age_{min(i),b}$ ) are indicated by red vertical bars and displayed on the  
 55 top horizontal axis.

56 **Table S2. Peak positions of  $\delta O_2/N_2$  identified as per method a and method b between 260 and 180 ka BP.** The age  
 57 difference found between methods a and b is calculated. The average age difference is of 700 years and the standard deviation  
 58 is of 250 years. EDC ice age as per AICC2012 and orbital ages as per Laskar et al. 2004.

| Peak position (ka BP) |          |            | Age difference (years)  |
|-----------------------|----------|------------|-------------------------|
| Method a              | Method b | Insolation | Between methods a and b |
| 197.64                | 197.94   | 196.8      | 300                     |
| 209.19                | 209.14   | 210.1      | 50                      |
| 220.69                | 220.24   | 220.8      | 450                     |
| 232.09                | 229.94   | 231.7      | 2,150                   |

|        |        |       |                         |
|--------|--------|-------|-------------------------|
| 241.84 | 241.24 | 240.1 | 600                     |
|        |        |       | Average: 700            |
|        |        |       | Standard deviation: 250 |

59

## 60 2.2 Aligning EDC $\delta^{18}\text{O}_{\text{atm}}$ record and climatic precession variations

61 For the construction of the new AICC2023 chronology between 800 and 590 ka BP, the EDC  $\delta^{18}\text{O}_{\text{atm}}$  record is  
62 aligned with the climatic precession delayed or not by 5,000 years depending on the occurrence of Heinrich like  
63 events, reflected by peaks in the IRD record from the North Atlantic Ocean (Sect 3.2.3 in the main text). Potential  
64 errors may arise from aligning  $\delta^{18}\text{O}_{\text{atm}}$  to precession (Oyabu et al., 2022). To support the use of our approach, we  
65 test three methodologies to align  $\delta^{18}\text{O}_{\text{atm}}$  and precession. Four test chronologies are built:

- 66 1) The test chronology 1 is obtained by aligning  $\delta^{18}\text{O}_{\text{atm}}$  to 5-kyr-delayed precession as in Bazin et al. (2013).
- 67 2) The test chronology 2 is obtained by aligning  $\delta^{18}\text{O}_{\text{atm}}$  to precession as it would be expected if only precession  
68 is driving the  $\delta^{18}\text{O}_{\text{atm}}$  signal.
- 69 3) The test chronology 3 is obtained by aligning  $\delta^{18}\text{O}_{\text{atm}}$  to precession delayed if IRD counts are superior to 10  
70 counts  $\text{g}^{-1}$  and to precession without delay if IRD counts are inferior to 10 counts  $\text{g}^{-1}$ .
- 71 4) The test chronology 4 is obtained by matching  $\delta^{18}\text{O}_{\text{atm}}$  and  $\delta^{18}\text{O}_{\text{calcite}}$  variations only.

72

### 73 2.2.1 Between 810 and 590 ka BP

74 We first evaluate the impact on the chronology whether  $\delta^{18}\text{O}_{\text{atm}}$  is aligned with the precession with or without delay  
75 between 810 and 590 ka BP. The age mismatch between test chronologies 1 and 2 is of 3,000 years on average,  
76 reaching its maximum value of 3,700 years at  $712 \pm 2.6$  ka BP (red arrow in Fig. S4).

77

78

79

80

81

82

83

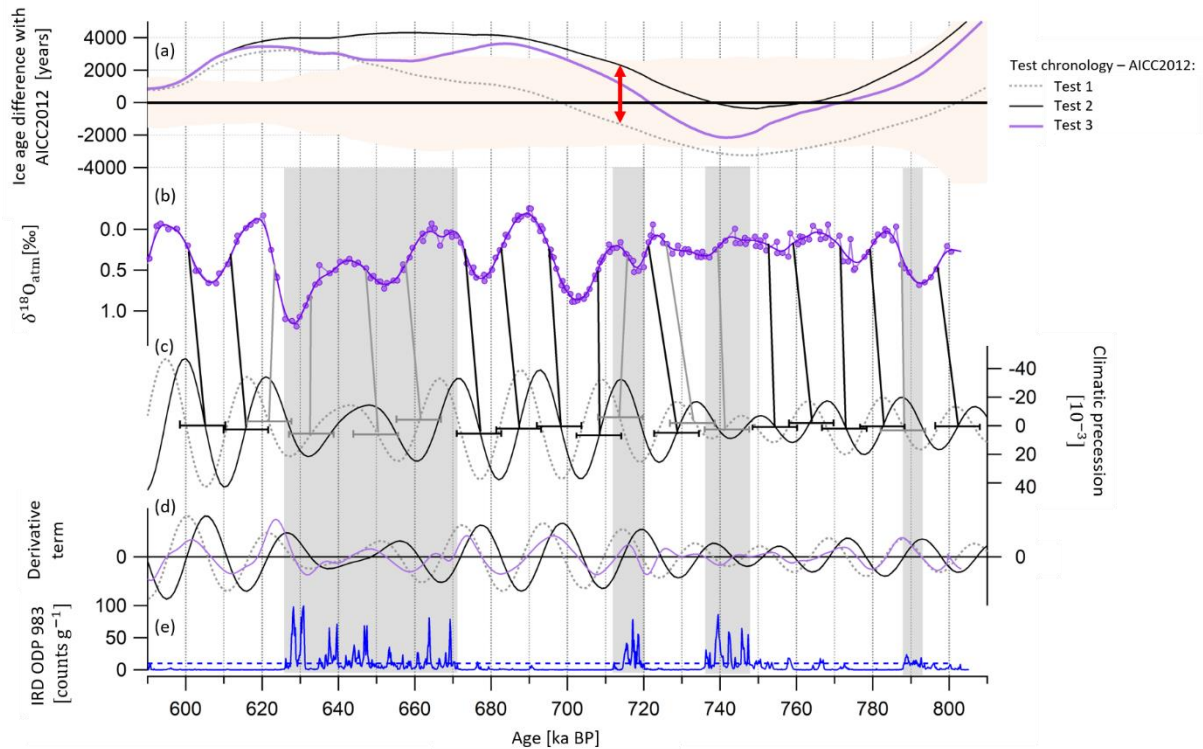

84 **Figure S4. Alignment of EDC  $\delta^{18}\text{O}_{\text{atm}}$  and climatic precession and impact on the chronology between 810 and 590 ka**  
 85 **BP.** (a) EDC ice age difference between AICC2012 and three test chronologies (1) test chronology 1 (grey dotted line), (2) test  
 86 chronology 2 (black dashed line), (3) test chronology 3 (purple plain line). AICC2023 ice age  $1\sigma$  uncertainty is shown by the  
 87 orange area. The largest age difference between chronology 1 and 2 is indicated by the red arrow at  $712.0 \pm 2.6$  ka BP. (b)  
 88 Compiled EDC  $\delta^{18}\text{O}_{\text{atm}}$  (purple circles). (c) Precession delayed by 5 kyr (grey dotted line) and not delayed (black dashed line)  
 89 (Laskar et al. 2004). (d) Temporal derivative of precession (black dashed line), delayed precession (grey dotted line) and of the  
 90 compiled  $\delta^{18}\text{O}_{\text{atm}}$  record (purple plain line). (e) IRD (red by McManus et al. 1999; blue by Barker et al. 2019, 2021). The gray  
 91 squares indicate periods where IRD counts are superior to the 10 counts  $\text{g}^{-1}$  threshold shown by the blue dotted horizontal line.  
 92 Grey vertical bars illustrate new tie points between EDC  $\delta^{18}\text{O}_{\text{atm}}$  and delayed precession mid-slopes (i.e. derivative extrema)  
 93 when IRD counts are superior to the threshold. Black vertical bars illustrate new tie points between EDC  $\delta^{18}\text{O}_{\text{atm}}$  and precession  
 94 mid-slopes (i.e. derivative extrema) when no Heinrich-like events is shown by IRD record. The 12 kyr  $2\sigma$ -uncertainty attached  
 95 to the tie points is shown by the horizontal error-bars in panel b.

### 96 2.2.2 Between 300 and 100 ka BP

97 Then, we test the three methodologies to align  $\delta^{18}\text{O}_{\text{atm}}$  and precession over the 100-300 ka period, where we have  
 98 high confidence in our chronology.

99 Over this time interval, the test chronology 3 appears to be the best compromise as it agrees well with both the  
 100 AICC2023 age model and the chronology derived from  $\delta^{18}\text{O}_{\text{atm}}-\delta^{18}\text{O}_{\text{calcite}}$  matching (Fig. S5). This is why we  
 101 believe that it can faithfully be applied to the bottom part of the EDC ice core while keeping large uncertainties in  
 102 the tie points ( $1\sigma$  uncertainty of 6 kyr).

103 This agreement is particularly satisfying over the 120-160 ka BP time interval. Over this period, Oyabu et al.  
 104 (2022) identified a large peak (up to 61%) in the IRD record of McManus et al. (1999) (red plain line in panel e)  
 105 corresponding to HE 11 between 131 and 125 ka BP. Yet, if we consider the IRD record of Barker et al. (2019,



106 2021) used in our study because it covers the last 800 kyr (blue plain line in panel e), we observe another large  
 107 peak (up to 56 counts g<sup>-1</sup>) at around 150-156 ka BP. Because of this presence of IRD, to establish the test  
 108 chronology 3, we tuned  $\delta^{18}\text{O}_{\text{atm}}$  to the 5-kyr delayed precession over the whole period stretching from 155 to 124  
 109 ka BP (gray frame), which is larger than the duration covering only HE 11.

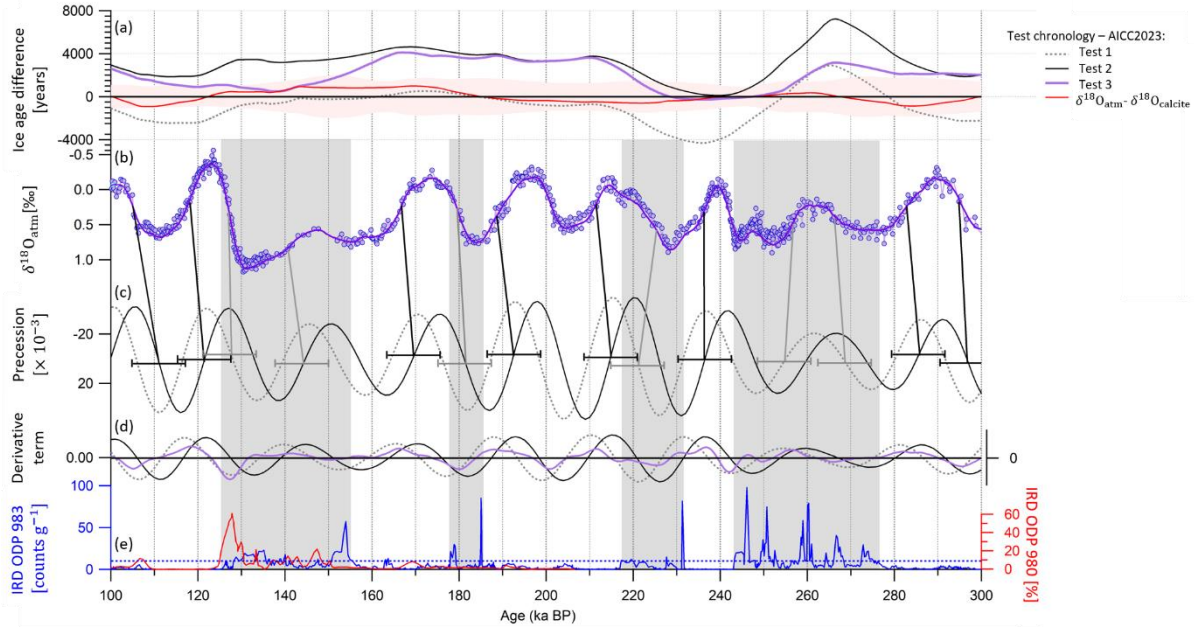

110 **Figure S5. EDC ice age difference between test chronology and AICC2023 between 300 and 100 ka BP.** (a) EDC ice age  
 111 difference between AICC2023 and 4 tests chronologies: (1) test chronology 1 (grey dotted line), (2) test chronology 2 (black  
 112 dashed line), (3) test chronology 3 (purple plain line) and (4) test chronology 4 derived using only  $\delta^{18}\text{O}_{\text{atm}}-\delta^{18}\text{O}_{\text{calcite}}$  matching  
 113 (red plain line). AICC2023 ice age  $1\sigma$  uncertainty is shown by the red area. (b)  $\delta^{18}\text{O}_{\text{atm}}$  data from EDC (purple circles) and  
 114 Vostok (blue circles). (c) Precession delayed by 5 kyr (grey dotted line) and not delayed (black dashed line) (Laskar et al.  
 115 2004). (d) Temporal derivative of precession (black dashed line), delayed precession (grey dotted line) and of the compiled  
 116  $\delta^{18}\text{O}_{\text{atm}}$  record (purple plain line). (e) IRD (red by McManus et al. 1999; blue by Barker et al. 2019, 2021). The gray squares  
 117 indicate periods where IRD counts are superior to the 10 counts g<sup>-1</sup> threshold shown by the blue dotted horizontal line. Grey  
 118 vertical bars illustrate new tie points between EDC  $\delta^{18}\text{O}_{\text{atm}}$  and delayed precession when IRD counts are superior to the  
 119 threshold. Black vertical bars illustrate new tie points between EDC  $\delta^{18}\text{O}_{\text{atm}}$  and precession when no Heinrich-like event is  
 120 shown by IRD record. The 12 kyr  $2\sigma$ -uncertainty attached to the tie points is shown by the horizontal error-bars in panel b.

### 121 3. Sensitivity tests on background scenarios and associated relative uncertainties

122

#### 123 3.1 Background lock-in-depth (LID) scenario at Dome C

124 The background LID scenario can be derived either from the  $\delta^{15}\text{N}$  data (i.e. experimental LID), or from firm  
 125 modeling (i.e. modeled LID). We favor the use of  $\delta^{15}\text{N}$  data when there are available. Over depth intervals where  
 126 no measurements of  $\delta^{15}\text{N}$  were made, the LID can be deduced from firm modeling or from a synthetic  $\delta^{15}\text{N}$  record  
 127 using the  $\delta\text{D}-\delta^{15}\text{N}$  relationship (Bazin et al., 2013). In this work, we assess the credibility of three composite LID  
 128 scenario (Table S3) constructed using the firm model (Bréant et al., 2017) or the synthetic  $\delta^{15}\text{N}$  record when no  
 129 data are available. The credibility is defined by the criterion  $\Delta$  as per:

130

$$\Delta = |(\text{analyzed LID} - \text{background LID})|$$



131  $\Delta$  represents the average absolute value of the mismatch between the background LID (i.e. prior LID provided in  
 132 input in PaleoChrono) and analyzed LID (i.e. the posterior LID given by PaleoChrono) scenarios of LID. The  
 133 weaker is  $\Delta$ , the closer the background scenario is to the analyzed scenario, meaning that the background scenario  
 134 is in relatively good agreement with chronological information compelling the inverse model in PaleoChrono. On  
 135 the contrary, the larger is  $\Delta$ , the more PaleoChrono is forced to significantly modify the background scenario which  
 136 is incompatible with the chronological constraints. Therefore, the larger  $\Delta$  is, the less credible is the prior LID  
 137 scenario. It should be noted that the relative error in the prior LID scenario and the age constraints input in  
 138 PaleoChrono are equal in each test, so that the mismatch  $\Delta$  is only impacted by the value of the prior LID from one  
 139 test to another. Three background scenarios of LID are tested (Table S3).

140 **Table S3. Test of three composite background LID scenarios.** Test A corresponds to the background LID used to constrain  
 141 AICC2012 chronology. Test B corresponds to the background LID used in the new AICC2023 chronology. Configuration 1  
 142 implies consideration of impurity concentration in the firn model. Configuration 2 implies **no** consideration of impurity  
 143 concentration in the firn model.

|                            | Test                                                                                                                       |                                                                                                                                      |                                                                                                                                      | $\delta^{15}\text{N}$ data<br>availability | Depth<br>interval (m)                                      |
|----------------------------|----------------------------------------------------------------------------------------------------------------------------|--------------------------------------------------------------------------------------------------------------------------------------|--------------------------------------------------------------------------------------------------------------------------------------|--------------------------------------------|------------------------------------------------------------|
|                            | A (AICC2012)                                                                                                               | B (AICC2023)                                                                                                                         | C                                                                                                                                    |                                            |                                                            |
| <b>LID<br/>calculation</b> | From raw $\delta^{15}\text{N}$<br>data assuming a<br>negligible<br>thermal signal.                                         | From $\delta^{15}\text{N}$ data<br>corrected for<br>thermal<br>fractionation<br>estimated by the<br>firn model<br>(configuration 1). | From $\delta^{15}\text{N}$ data<br>corrected for<br>thermal<br>fractionation<br>estimated by the<br>firn model<br>(configuration 2). | Yes                                        | [345 – 578],<br>[1086 –<br>1169] and<br>[1386 –<br>bottom] |
|                            | From $\delta^{15}\text{N}$<br>synthetic record<br>(using the $\delta\text{D}$ -<br>$\delta^{15}\text{N}$<br>relationship). | From firn<br>modeling<br>(configuration 1)                                                                                           | From firn<br>modeling<br>(configuration 2)                                                                                           | No                                         | [0 – 345],<br>[578 – 1086]<br>and<br>[1169 –<br>1386]      |

144

145

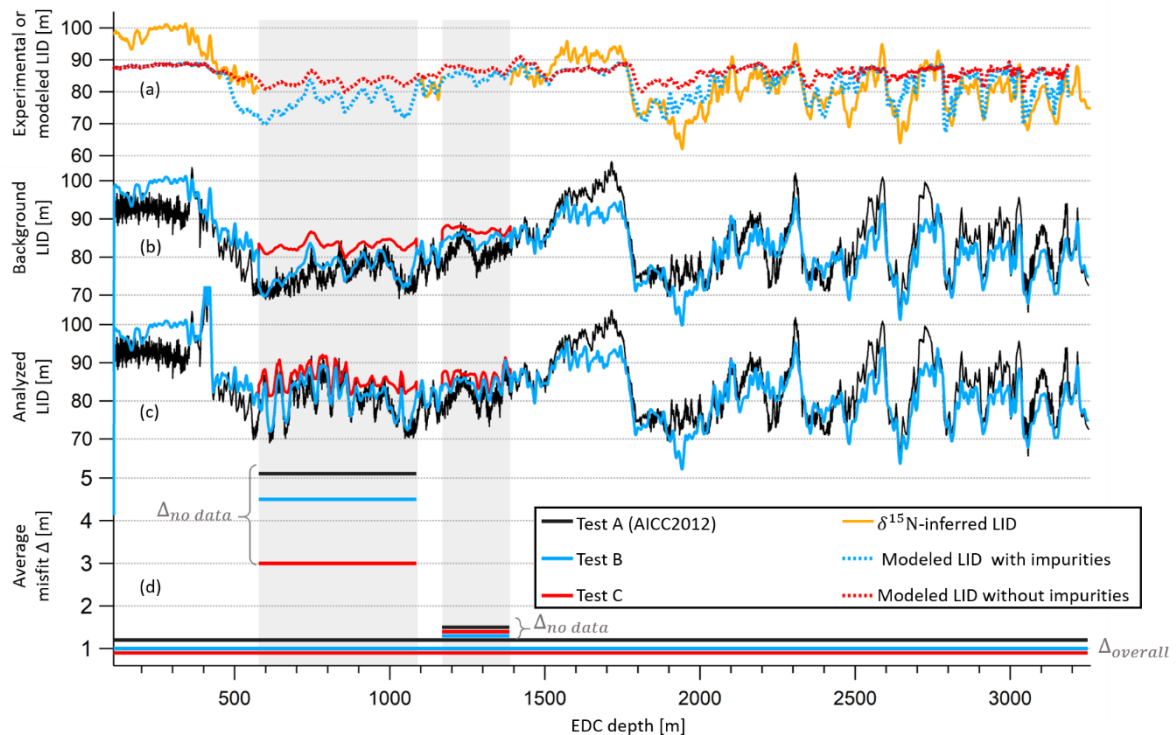

146 **Figure S6. Mismatch  $\Delta$  between background and analyzed LID for EDC over the 100-3200 m depth interval.** (a)  
 147 Experimental LID (orange) and modeled LID scenarios as per configuration 1 (with impurities, blue dots) and configuration 2  
 148 (without impurities, red dots). (b) Composite background LID as per tests A (black), B (blue) and C (red). (c) Analyzed LID  
 149 scenarios given by Paleochrono. (d) Three values of the misfit  $\Delta$  are calculated for the three composite LID:  $\Delta_{no\ data}$ , averaged  
 150 over the two depth intervals where  $\delta^{15}\text{N}$  data are not available (either between 578 and 1086 m or between 1169 and 1386 m,  
 151 see intervals shown by grey rectangles), and  $\Delta_{overall}$ , averaged over the whole 3200 m.

152 For the construction of the AICC2012 timescale, the background LID scenario at EDC was derived from a  
 153 synthetic  $\delta^{15}\text{N}$  record using the  $\delta\text{D}-\delta^{15}\text{N}$  relationship (Bazin et al., 2013). Yet, this scenario (A, Table S3) is  
 154 associated with the largest mismatch criterion over the last 800 kyr, reaching  $\Delta = 5$  m over the 578-1086 m depth  
 155 interval where no  $\delta^{15}\text{N}$  data are available (Fig. S6). Hence it is believed to be the least pertinent among the three  
 156 tested scenarios and we decided not to use the  $\delta\text{D}-\delta^{15}\text{N}$  relationship to construct the prior LID scenario in this  
 157 work.

158 Modeled LID scenarios (B and C, Table S3) are characterized by smaller mismatch criteria  $\Delta$  than LID A regardless  
 159 of the depth interval considered (Fig. S6), hence we believe that firm modeling estimates reproduce well the  
 160 evolution of past LID at EDC site. In the firm model, the creep factor can be either dependent on impurity inclusion  
 161 inducing firm softening (giving LID B) or not (giving LID C). The LID sensitivity to the impurity parameter is  
 162 evaluated by comparing LID B and LID C performances. Even though LID B is associated with a smaller criterion  
 163  $\Delta$  between 578 and 1086 m, LID B and LID C show comparable values for  $\Delta$  over the last 800 kyr (Fig. S6).  
 164 Bréant et al. (2017) argued that implementing the impurity dependence in the model reduces the  $\delta^{15}\text{N}$  data-model  
 165 mismatch at Dome C. This is particularly verified over deglaciations where significant LID augmentations inferred  
 166 from  $\delta^{15}\text{N}$  are well reproduced by the modeled LID when the impurity parameter is included (panel a in Fig. S6).  
 167 We thus follow the recommendation of Bréant et al. (2017) and use the composite LID B scenario to constrain the  
 168 new AICC2023 chronology.

169 Discontinuities are visible when switching from experimental to modeled values when no data are  
 170 available (grey rectangles on Fig. S7). To avoid these discontinuities, we test a LID scenario where the modeled  
 171 LID is fitted to experimental LID values (orange curve in Fig. S7). In other words, the firm modeling estimates are  
 172 adjusted, by standard normalization, to the scale of LID values derived from  $\delta^{15}\text{N}$  data. Adjusting the modeled  
 173 LID to experimental LID values induces a modification of 4.7 m at most (see red arrow) which remains within the  
 174 background relative uncertainty (20%).

175 On the depth interval from 578 to 1086 m, the modeled scenario without any fitting to  $\delta^{15}\text{N}$ -inferred LID (blue  
 176 curve, Fig. S7) is almost as effective as the one that was fitted (orange curve, Fig. S7) (i.e., close  $\Delta$  values). On the  
 177 second depth interval of interest, from 1169 to 1386 m, both scenarios show equal  $\Delta$  values.

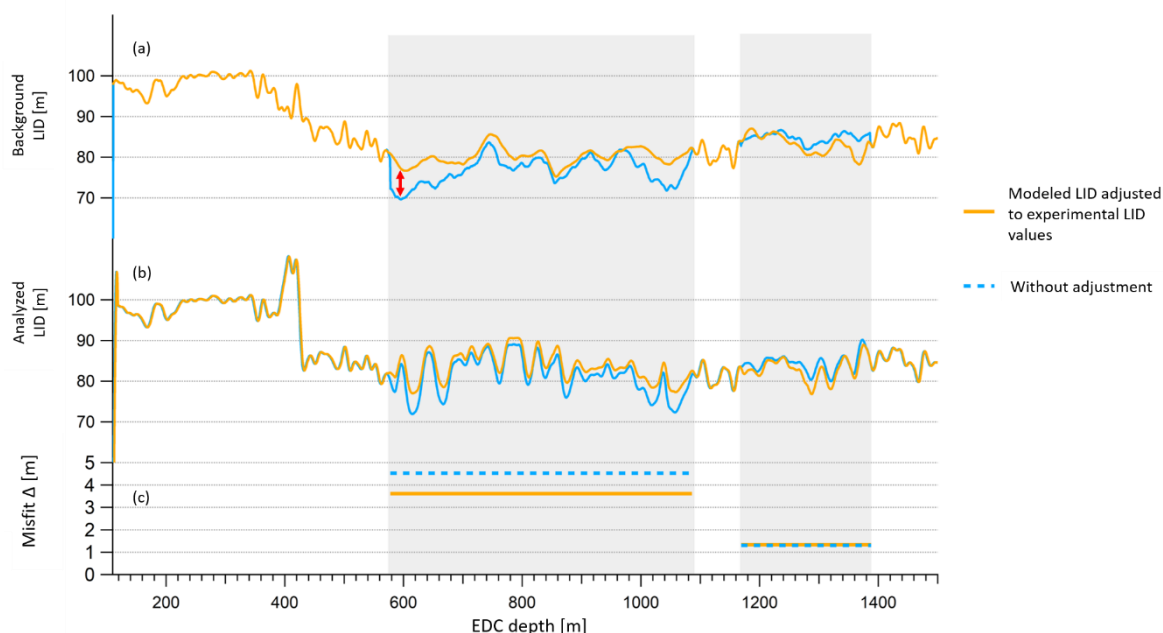

178 **Figure S7. Mismatch  $\Delta$  between background and analyzed LID for EDC over the 100-1500 m depth interval.** (a)  
 179 Background LID with and without adjusting the modeled LID to experimental LID values (orange and blue curves  
 180 respectively). (b) Analyzed LID. (c) The averaged value of the misfit,  $\Delta$ , is calculated for the two LID over the two depth  
 181 intervals where  $\delta^{15}\text{N}$  data are not available (either between 578 and 1086 m or between 1169 and 1386 m, see intervals shown  
 182 by grey rectangles).

183 We thus conclude that we can keep the scenario combining  $\delta^{15}\text{N}$ -inferred LID and modeled LID in the construction  
 184 of AICC2023.

### 185 3.2 Background uncertainties for LID, accumulation rate and thinning scenarios

186 Although there is no objective way to assign specific prior uncertainties, the values chosen by Bazin et al. (2013)  
 187 seem unrealistic (i.e. 80 % of uncertainty for the LID during some glacial periods at EDC whereas firn modeling  
 188 and  $\delta^{15}\text{N}$  agree within a 20 %-margin at most). That is why we believe the prior uncertainties should be reduced  
 189 in AICC2023 and implement the following major changes (blue plain line in Fig. S8 and S9):

- 190 - The LID background relative uncertainty is reduced to values oscillating between 10 and 20 % at most,  
 191 excluding values reaching 80 % used in AICC2012. The reason for this modification is that in 2012, the  
 192 mismatch between firn model outputs and  $\delta^{15}\text{N}$ -inferred LID was not understood. In the meantime, much  
 193 progresses have been made, confirming that the  $\delta^{15}\text{N}$ -inferred LID was correct and firn models or their  
 194 forcing have been adapted (Parrenin et al., 2012; Bréant et al., 2017; Buizert et al., 2021).
- 195 - The thinning relative uncertainty is evolving linearly, rather than exponentially as it was done in  
 196 AICC2012. The linear uncertainty permits to have a significant uncertainty at intermediate depth levels  
 197 while with the exponential shape, the uncertainty was essentially located at lower depth levels, which was  
 198 not realistic.
- 199 - The accumulation relative uncertainty is decreased to 20 %, as opposed to 60 % used in AICC2012. This  
 200 choice is motivated by the study of Parrenin et al. (2007) who counted event duration in EDC and DF ice  
 201 cores and found out an offset of 20 % on average.

202 We build different test chronologies by keeping the same age constraints and background scenarios as in  
 203 AICC2023 but varying the background errors (Table S4). The largest age offset is observed between the test  
 204 AICC2012 and the other test chronologies at around 650 ka BP. It reaches 400 years (see red arrow in Fig. S8),  
 205 which is not significant considering the uncertainty associated with the test chronologies over this period (ranging  
 206 from 1,800 to 3,400 years). Since varying the background uncertainties has no significant impact on the final age  
 207 model and the background uncertainties of AICC2012 seem unrealistic, we reduce the background errors with  
 208 respect to AICC2012 and we use the Test 5 configuration from Table S4 to construct AICC2023.

209 **Table S4. The different prior relative uncertainties tested for LID, thinning and accumulation.** The LID prior relative  
 210 uncertainty is set between 0.1 or 0.2 whether  $\delta^{15}\text{N}$  data are available or not.

| Test             | Sites   | LID                         | Thinning                                     | Accumulation                           |
|------------------|---------|-----------------------------|----------------------------------------------|----------------------------------------|
| Test<br>AICC2012 | EDC     |                             |                                              |                                        |
|                  | EDML    |                             |                                              |                                        |
|                  | VK      |                             |                                              |                                        |
|                  | TALDICE |                             |                                              |                                        |
|                  | NGRIP   |                             |                                              |                                        |
| Test 0           | EDC     | 0.1 (data) or 0.2 (no data) | Linear from 0 to 0.5                         | 0.2                                    |
|                  | EDML    | 0.1 (data) or 0.2 (no data) | Linear from 0 to 0.5                         | From AICC2012<br>(between 0.2 and 0.8) |
|                  | VK      | 0.1 (data) or 0.2 (no data) | Linear from 0 to 0.5                         | Linear from 0.2 to 0.7                 |
|                  | TALDICE | 0.2                         | From AICC2012<br>(exponential from 0 to 2.4) | 0.2                                    |
|                  | NGRIP   | 0.2                         | Linear from 0 to 0.5                         | 0.2                                    |
| Test 1           | EDC     | 0.1 (data) or 0.2 (no data) | Linear from 0 to 0.5                         | 0.2                                    |
|                  | EDML    | 0.1 (data) or 0.2 (no data) | Linear from 0 to 1                           | From AICC2012<br>(between 0.2 and 0.8) |
|                  | VK      | 0.1 (data) or 0.2 (no data) | Linear from 0 to 0.5                         | Linear from 0.2 to 0.7                 |
|                  | TALDICE | 0.2                         | From AICC2012                                | 0.2                                    |

|                      |                |                                    |                                              |                               |
|----------------------|----------------|------------------------------------|----------------------------------------------|-------------------------------|
|                      |                |                                    | (exponential from 0 to 2.4)                  |                               |
|                      | NGRIP          | 0.2                                | Linear from 0 to 0.5                         | 0.2                           |
| Test 2               | EDC            | 0.1 (data) or 0.2 (no data)        | Linear from 0 to 0.5                         | 0.2                           |
|                      | EDML           | 0.1 (data) or 0.2 (no data)        | Linear from 0 to 0.5                         | 0.2                           |
|                      | VK             | 0.1 (data) or 0.2 (no data)        | Linear from 0 to 0.5                         | Linear from 0.2 to 0.7        |
|                      | TALDICE        | 0.2                                | From AICC2012<br>(exponential from 0 to 2.4) | 0.2                           |
|                      | NGRIP          | 0.2                                | Linear from 0 to 0.5                         | 0.2                           |
| Test 3               | EDC            | 0.1 (data) or 0.2 (no data)        | Linear from 0 to 0.5                         | 0.2                           |
|                      | EDML           | 0.1 (data) or 0.2 (no data)        | Linear from 0 to 1                           | 0.2                           |
|                      | VK             | 0.1 (data) or 0.2 (no data)        | Linear from 0 to 0.5                         | Linear from 0.2 to 0.7        |
|                      | TALDICE        | 0.2                                | From AICC2012<br>(exponential from 0 to 2.4) | 0.2                           |
|                      | NGRIP          | 0.2                                | Linear from 0 to 0.5                         | 0.2                           |
| Test 4               | EDC            | 0.1 (data) or 0.2 (no data)        | Linear from 0 to 0.5                         | 0.2                           |
|                      | EDML           | 0.1 (data) or 0.2 (no data)        | Linear from 0 to 0.5                         | Linear from 0.2 to 0.7        |
|                      | VK             | 0.1 (data) or 0.2 (no data)        | Linear from 0 to 0.5                         | Linear from 0.2 to 0.7        |
|                      | TALDICE        | 0.2                                | From AICC2012<br>(exponential from 0 to 2.4) | 0.2                           |
|                      | NGRIP          | 0.2                                | Linear from 0 to 0.5                         | 0.2                           |
| Test 5<br>(AICC2023) | <b>EDC</b>     | <b>0.1 (data) or 0.2 (no data)</b> | <b>Linear from 0 to 0.5</b>                  | <b>0.2</b>                    |
|                      | <b>EDML</b>    | <b>0.1 (data) or 0.2 (no data)</b> | <b>Linear from 0 to 1</b>                    | <b>0.2</b>                    |
|                      | <b>VK</b>      | <b>0.1 (data) or 0.2 (no data)</b> | <b>Linear from 0 to 0.5</b>                  | <b>Linear from 0.2 to 0.7</b> |
|                      | <b>TALDICE</b> | <b>0.2</b>                         | <b>Linear from 0 to 1</b>                    | <b>0.2</b>                    |
|                      | <b>NGRIP</b>   | <b>0.2</b>                         | <b>Linear from 0 to 0.5</b>                  | <b>0.2</b>                    |

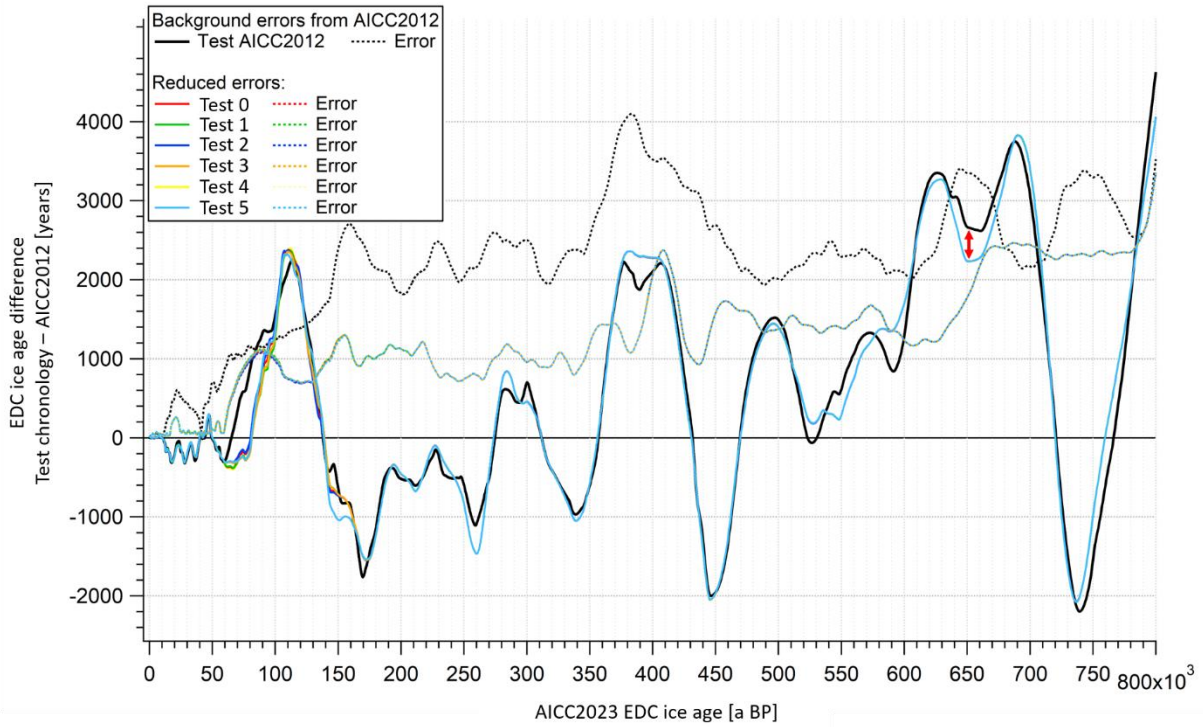

211 **Figure S8. EDC ice age difference between each test chronology and AICC2012 timescale between 800 and 0 ka BP.**  
 212 The ice age uncertainty ( $1\sigma$ ) obtained for each test is shown by the dotted lines. The red arrow indicates the largest age mismatch  
 213 between the test chronologies.

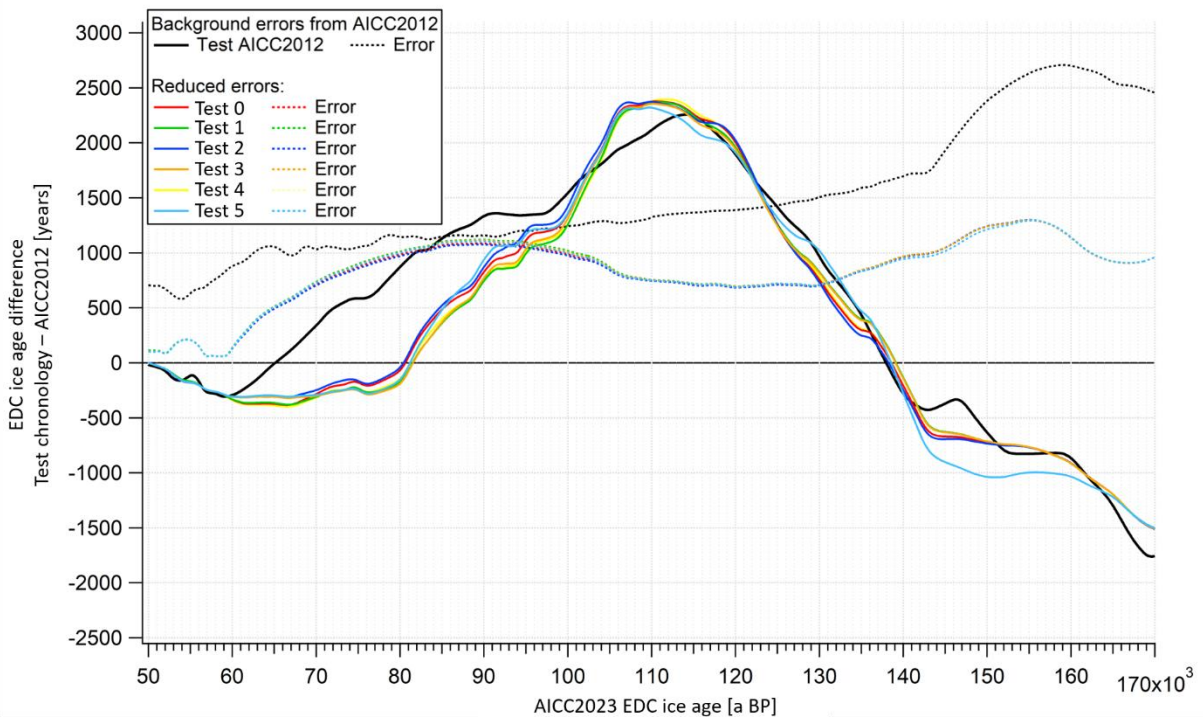

214 **Figure S9. EDC ice age difference between each test chronology and AICC2012 timescale between 170 and 50 ka BP.**  
 215 The ice age uncertainty ( $1\sigma$ ) obtained for each test is shown by dotted lines.

216



217 **4 The new AICC2023 chronology**

218

219 **4.1 New age constraints**

220

221 **4.1.1  $\delta^{18}\text{O}_{\text{atm}}$ ,  $\delta\text{O}_2/\text{N}_2$  and TAC age constraints for EDC**

222 **Table S5.  $\delta^{18}\text{O}_{\text{atm}}$ ,  $\delta\text{O}_2/\text{N}_2$  and TAC age constraints used for EDC in AICC2023.** Sources: A (this work), B (Bazin et al.,  
223 2013) and C (Extier et al., 2018a).

| $\delta^{18}\text{O}_{\text{atm}}$ |                 |                     |        | $\delta\text{O}_2/\text{N}_2$ |                 |                     |        | TAC           |                 |                     |        |
|------------------------------------|-----------------|---------------------|--------|-------------------------------|-----------------|---------------------|--------|---------------|-----------------|---------------------|--------|
| EDC depth (m)                      | Gas age (ka BP) | Uncertainty (years) | Source | EDC depth (m)                 | Ice age (ka BP) | Uncertainty (years) | Source | EDC depth (m) | Ice age (ka BP) | Uncertainty (years) | Source |
| 1465.61                            | 108.50          | 1303.84             | C      | 1495.96                       | 117.4           | 3000                | A      | 645.31        | 30.95           | 3000                | A      |
| 1585.2                             | 120.90          | 1303.84             | C      | 1652.39                       | 125.8           | 3000                | A      | 782.86        | 47.95           | 3000                | A      |
| 1706.92                            | 128.80          | 1303.84             | C      | 1772.83                       | 138.1           | 3000                | A      | 1337.51       | 93.85           | 3000                | A      |
| 1903.01                            | 160.40          | 1860.11             | C      | 1823.08                       | 150.1           | 3000                | A      | 1453.56       | 107.15          | 3000                | A      |
| 1921.37                            | 163.00          | 1860.11             | C      | 1915.39                       | 164.6           | 3000                | A      | 1588.23       | 118.35          | 3000                | A      |
| 1931.13                            | 165.20          | 1860.11             | C      | 1964.71                       | 176             | 3000                | A      | 1650.52       | 124.75          | 3000                | A      |
| 1997.19                            | 178.30          | 1860.11             | C      | 2008.15                       | 187.2           | 3000                | A      | 1747.64       | 135.95          | 3000                | A      |
| 2050.18                            | 191.80          | 2282.54             | C      | 2065.72                       | 196.8           | 3000                | A      | 1853.73       | 150.05          | 3000                | A      |
| 2096.02                            | 199.00          | 2282.54             | C      | 2128.92                       | 210.1           | 3000                | A      | 1938.82       | 165.35          | 3000                | A      |
| 2139.91                            | 207.90          | 2282.54             | C      | 2196.61                       | 220.8           | 3000                | A      | 2121.53       | 210.05          | 3000                | A      |
| 2160.01                            | 209.3           | 2282.54             | A      | 2232.66                       | 231.7           | 3000                | A      | 2205.70       | 222.85          | 3000                | A      |
| 2229.99                            | 225.3           | 1303.84             | C      | 2281.09                       | 240.1           | 3000                | A      | 2237.52       | 230.45          | 3000                | A      |
| 2232.88                            | 227.60          | 1253                | A      | 2336.71                       | 253.4           | 3000                | A      | 2274.72       | 238.9           | 3000                | A      |
| 2258.68                            | 233.2           | 1486.61             | A      | 2374.24                       | 268             | 3000                | A      | 2318.83       | 252.55          | 3000                | A      |
| 2300.06                            | 242.20          | 1140.18             | C      | 2406.67                       | 281.1           | 3000                | A      | 2383.34       | 268.95          | 3000                | A      |
| 2332.74                            | 248.4           | 1140.18             | A      | 2438.00                       | 290.4           | 3000                | A      | 2505.82       | 313.35          | 3000                | A      |
| 2363.62                            | 258.70          | 1140.18             | C      | 2469.99                       | 302.2           | 3000                | A      | 2623.99       | 353.65          | 3000                | A      |
| 2376.66                            | 264.40          | 1140.18             | C      | 2502.46                       | 312.8           | 3000                | A      | 2633.73       | 362.125         | 3000                | A      |
| 2409.39                            | 279.00          | 2459.67             | C      | 2536.47                       | 325.1           | 3000                | A      | 2759.45       | 417.15          | 6000                | A      |
| 2451.16                            | 289.00          | 2459.67             | C      | 2572.12                       | 334.6           | 3000                | A      | 2792.11       | 434.15          | 6000                | A      |
| 2466.27                            | 293.90          | 2459.67             | C      | 2603.71                       | 344.2           | 3000                | A      | 2815.91       | 467.05          | 6000                | A      |
| 2475.81                            | 301.30          | 1941.65             | C      | 2622.61                       | 354.1           | 6000                | A      | 2823.81       | 475.4           | 6000                | A      |
| 2490.37                            | 304.90          | 1941.65             | C      | 2639.97                       | 366.6           | 6000                | A      | 2831.30       | 483.55          | 3000                | A      |
| 2522.11                            | 316.60          | 1303.84             | C      | 2677.69                       | 372.5           | 6000                | A      | 2850.57       | 495.45          | 3000                | A      |
| 2582.63                            | 334.30          | 1303.84             | C      | 2685.82                       | 377.8           | 6000                | A      | 2931.35       | 556.25          | 6000                | A      |
| 2599.92                            | 337.90          | 1253                | C      | 2763.95                       | 418.1           | 6000                | A      | 2962.01       | 569.25          | 6000                | A      |
| 2664.62                            | 377.30          | 1421.27             | C      | 2805.78                       | 454.9           | 6000                | A      | 2986.85       | 578.35          | 6000                | A      |
| 2679.89                            | 385.70          | 1627.88             | C      | 2815.83                       | 465.7           | 6000                | A      | 3000.24       | 587.95          | 6000                | A      |
| 2707.22                            | 398.50          | 3008.32             | C      | 2820.37                       | 475.4           | 6000                | A      | 3013.99       | 599.85          | 3000                | A      |
| 2776.91                            | 425.9           | 1702.94             | A      | 2833.08                       | 484.2           | 3000                | A      | 3020.93       | 611.65          | 3000                | A      |
| 2784.70                            | 428.8           | 1702.94             | A      | 2849.73                       | 496             | 3000                | A      | 3029.38       | 621.55          | 3000                | A      |

|         |        |         |   |         |       |       |   |         |        |       |   |
|---------|--------|---------|---|---------|-------|-------|---|---------|--------|-------|---|
| 2791.70 | 434.5  | 1702.94 | A | 2863.56 | 506.5 | 3000  | A | 3035.80 | 629.75 | 3000  | A |
| 2793.91 | 440.3  | 1702.94 | A | 2880.63 | 517.3 | 3000  | A | 3043.28 | 642.85 | 3000  | A |
| 2838.23 | 483.90 | 4632.49 | C | 2892.99 | 525.5 | 3000  | A | 3068.47 | 682.75 | 10000 | A |
| 2857.55 | 500.60 | 4632.49 | C | 2914.24 | 542.5 | 3000  | A | 3078.07 | 691.55 | 10000 | A |
| 2873.92 | 504.10 | 7382.41 | C | 2929.86 | 556.2 | 3000  | A | 3094.01 | 703    | 10000 | A |
| 2894.57 | 521.00 | 3008.32 | A | 2951.86 | 568.4 | 3000  | A | 3120.55 | 715.35 | 10000 | A |
| 2904.64 | 531.3  | 3195.31 | A | 2986.64 | 577.8 | 3000  | A | 3139.92 | 730.75 | 10000 | A |
| 2909.14 | 534.90 | 3195.31 | C | 3003.49 | 589.5 | 3000  | A | 3148.15 | 742.55 | 10000 | A |
| 2917.53 | 549.10 | 4245    | C | 3013.24 | 599.3 | 3000  | A | 3160.38 | 767.45 | 10000 | A |
| 2930.36 | 555.60 | 4341.66 | C | 3021.40 | 611.3 | 3000  | A | 3169.76 | 779.75 | 10000 | A |
| 2937.72 | 559.10 | 3668.79 | C | 3029.95 | 620.6 | 3000  | A | 3179.04 | 787.75 | 10000 | A |
| 3002.71 | 583.00 | 4632.49 | C | 3039.12 | 631.7 | 6000  | A |         |        |       |   |
| 3009.86 | 590.00 | 4341.66 | C | 3043.84 | 644.8 | 6000  | A |         |        |       |   |
| 3018.09 | 602.7  | 5805.17 | C | 3052.27 | 660.7 | 10000 | A |         |        |       |   |
| 3017.25 | 605.08 | 6000    | A | 3059.61 | 671.7 | 10000 | A |         |        |       |   |
| 3027.54 | 615.88 | 6000    | A | 3065.69 | 682.9 | 10000 | A |         |        |       |   |
| 3027.9  | 615.20 | 8471.72 | C | 3082.61 | 691.9 | 10000 | A |         |        |       |   |
| 3035.41 | 622.07 | 6000    | B | 3101.62 | 703.9 | 10000 | A |         |        |       |   |
| 3038.00 | 627.5  | 6888.4  | C | 3123.67 | 714.4 | 10000 | A |         |        |       |   |
| 3040.00 | 633    | 6888.4  | C | 3133.92 | 724.9 | 10000 | A |         |        |       |   |
| 3043.01 | 634.42 | 6000    | B | 3141.52 | 732.5 | 10000 | A |         |        |       |   |
| 3043.26 | 638.2  | 7481.31 | C | 3148.60 | 742.9 | 10000 | A |         |        |       |   |
| 3048.51 | 649.06 | 6000    | B | 3155.83 | 752.1 | 10000 | A |         |        |       |   |
| 3056.77 | 660.79 | 6000    | B | 3160.42 | 758.3 | 10000 | A |         |        |       |   |
| 3065.93 | 676.70 | 6000    | A | 3165.19 | 767.7 | 10000 | A |         |        |       |   |
| 3077.74 | 687.33 | 6000    | A | 3172.00 | 778.8 | 10000 | A |         |        |       |   |
| 3093.51 | 698.16 | 6000    | A | 3181.00 | 787.5 | 10000 | A |         |        |       |   |
| 3112.43 | 708.96 | 6000    | A |         |       |       |   |         |        |       |   |
| 3119.57 | 714.37 | 6000    | B |         |       |       |   |         |        |       |   |
| 3124.27 | 729.38 | 6000    | A |         |       |       |   |         |        |       |   |
| 3131.02 | 733.95 | 6000    | B |         |       |       |   |         |        |       |   |
| 3143.2  | 741.94 | 6000    | B |         |       |       |   |         |        |       |   |
| 3152.25 | 754.18 | 6000    | A |         |       |       |   |         |        |       |   |
| 3158.91 | 763.07 | 6000    | A |         |       |       |   |         |        |       |   |
| 3166.87 | 772.68 | 6000    | A |         |       |       |   |         |        |       |   |
| 3174.81 | 782.61 | 6000    | A |         |       |       |   |         |        |       |   |
| 3180.6  | 797.74 | 6000    | B |         |       |       |   |         |        |       |   |
| 3189.83 | 802.46 | 6000    | A |         |       |       |   |         |        |       |   |

224

225 **4.1.2  $\delta^{18}\text{O}_{\text{atm}}$  age constraints for Vostok**

226 Following the dating approach proposed by Extier et al. (2018a),  $\delta^{18}\text{O}_{\text{atm}}$  from Vostok ice core and  $\delta^{18}\text{O}_{\text{calcite}}$  from

227 Chinese speleothems (Cheng et al., 2016) are aligned using mid-slopes of their variations between 370 and 100 ka

228 BP (Fig. S10). To do so, the Vostok  $\delta^{18}\text{O}_{\text{atm}}$  record and the Chinese  $\delta^{18}\text{O}_{\text{calcite}}$  signal are linearly interpolated every  
 229 100 years, smoothed (25 points Savitzky-Golay) and extrema in their temporal derivative are aligned. 35 new tie  
 230 points are identified and attached to a  $1\sigma$ -uncertainty between 2.3 and 3.5 kyr. They replace the 35 age constraints  
 231 obtained by aligning  $\delta^{18}\text{O}_{\text{atm}}$  and delayed precession, associated with a 6 kyr  $1\sigma$ -uncertainty and used to construct  
 232 AICC2012.

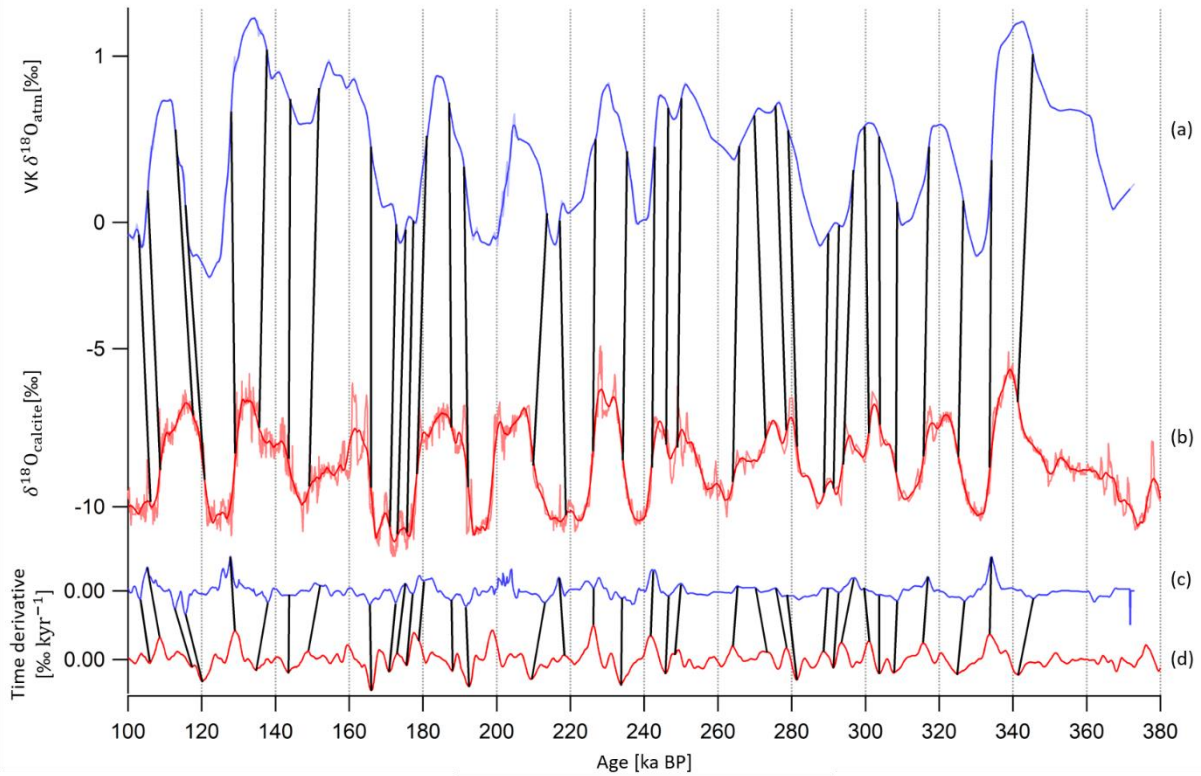

233 **Figure S10. Alignment of Vostok  $\delta^{18}\text{O}_{\text{atm}}$  and  $\delta^{18}\text{O}_{\text{calcite}}$  records between 370 and 100 ka BP.** (a) Vostok (VK)  $\delta^{18}\text{O}_{\text{atm}}$  raw  
 234 (light blue) and smoothed (dark blue, Savitzky-Golay 25 points) record (Petit et al., 1999). (b) Raw (light red) and smoothed  
 235 (red) composite  $\delta^{18}\text{O}_{\text{calcite}}$  from speleothems from Sambaio, Hulu and Dongge caves (Cheng et al., 2016). (c) Temporal derivative  
 236 of smoothed VK  $\delta^{18}\text{O}_{\text{atm}}$  (blue). (d) Temporal derivative of smoothed  $\delta^{18}\text{O}_{\text{calcite}}$  (red). Extrema in temporal derivatives are  
 237 aligned. New tie points used to constrain AICC2023 are represented by black vertical bars.

## 238 4.2 New background scenarios

### 239 4.2.1 LID scenario for Vostok using $\delta^{15}\text{N}$ and $\delta^{40}\text{Ar}$ data

240 When  $\delta^{15}\text{N}$  measurements are not available, Bazin et al. (2013) used a synthetic  $\delta^{15}\text{N}$  signal based on the  
 241 correlation between  $\delta^{15}\text{N}$  and  $\delta\text{D}$  to estimate the background LID scenario at Vostok and to constrain the  
 242 AICC2012 timescale. In this work, the background LID scenario is modified (Table S6). It is estimated from  $\delta^{15}\text{N}$   
 243 data or  $\delta^{40}\text{Ar}$  data (which also reflects evolution of the firm thickness) and corrected for thermal fractionation. The  
 244 thermal fractionation term is estimated by the firm model running in the same configuration as for calculating the  
 245 modeled LID at EDC (i.e. firm densification activation energy depending on the temperature and impurity  
 246 concentration). The final LID scenario has been smoothed using a Savitzky-Golay algorithm (25 points), and then  
 247 provided as an input file to Paleochrono (Fig. S11).

248 **Table S6. Method of determination of LID background scenario according to Vostok depth range.** The thermal  
 249 fractionation term is estimated by the firm model running in configuration 1: Firm densification activation energy depending on  
 250 the temperature and impurity concentration.

| <b>Depth range<br/>(m)</b>   | 0 – 150                                                                                                   | 150 – 2737                                                                                  | 2737 – 2847                                                                                  | 2847 – Bottom                                                                               |
|------------------------------|-----------------------------------------------------------------------------------------------------------|---------------------------------------------------------------------------------------------|----------------------------------------------------------------------------------------------|---------------------------------------------------------------------------------------------|
| <b>data<br/>availability</b> | No                                                                                                        | $\delta^{15}\text{N}$ (Sowers et al.,<br>1992)                                              | $\delta^{40}\text{Ar}$ (Caillon et al.,<br>2003)                                             | $\delta^{15}\text{N}$ (Sowers et al.,<br>1992)                                              |
| <b>LID</b>                   | From constant $\delta^{15}\text{N}$<br>(measured at 150 m)<br>and corrected for<br>thermal fractionation. | From $\delta^{15}\text{N}$ data,<br>corrected for thermal<br>fractionation and<br>smoothed. | From $\delta^{40}\text{Ar}$ data,<br>corrected for thermal<br>fractionation and<br>smoothed. | From $\delta^{15}\text{N}$ data,<br>corrected for thermal<br>fractionation and<br>smoothed. |

251

#### 252 4.2.2 LID scenario for EDML using $\delta^{15}\text{N}$ data and firn model estimates

253 When  $\delta^{15}\text{N}$  measurements are not available, Bazin et al. (2013) used a synthetic  $\delta^{15}\text{N}$  signal based on the  
 254 correlation between  $\delta^{15}\text{N}$  and  $\delta\text{D}$  to estimate the background LID scenario at EDML and to constrain the  
 255 AICC2012 timescale. In this work, the background LID scenario at EDML is estimated from  $\delta^{15}\text{N}$  data (when  
 256 available), which is corrected for thermal fractionation. The thermal fractionation term is estimated by the firn  
 257 model. Otherwise, the background LID is calculated by the firn model running in the same configuration as for  
 258 calculating the modeled LID at EDC (i.e. firn densification activation energy depending on the temperature and  
 259 impurity concentration). The final LID scenario has been smoothed using a Savitzky-Golay algorithm (25 points),  
 260 and then provided as an input file to Paleochrono (Fig. S11).

261 **Table S7. Method of determination of LID background scenario according to EDML depth range.** The thermal  
 262 fractionation term is estimated by the firm model running in the same configuration as for calculating the modeled LID, i.e. firn  
 263 densification activation energy depending on the temperature and impurity concentration.

| <b>Depth range (m)</b>                                        | 0 – 548                                                                                                | 548 – 1398.2                                                                             | 1398.2 – Bottom     |
|---------------------------------------------------------------|--------------------------------------------------------------------------------------------------------|------------------------------------------------------------------------------------------|---------------------|
| <b><math>\delta^{15}\text{N}</math> data<br/>availability</b> | No                                                                                                     | Yes (Landais et al., 2006)                                                               | No                  |
| <b>LID</b>                                                    | From constant $\delta^{15}\text{N}$ (measured<br>at 548 m) and corrected for<br>thermal fractionation. | From $\delta^{15}\text{N}$ data, corrected for<br>thermal fractionation and<br>smoothed. | From firn modeling. |

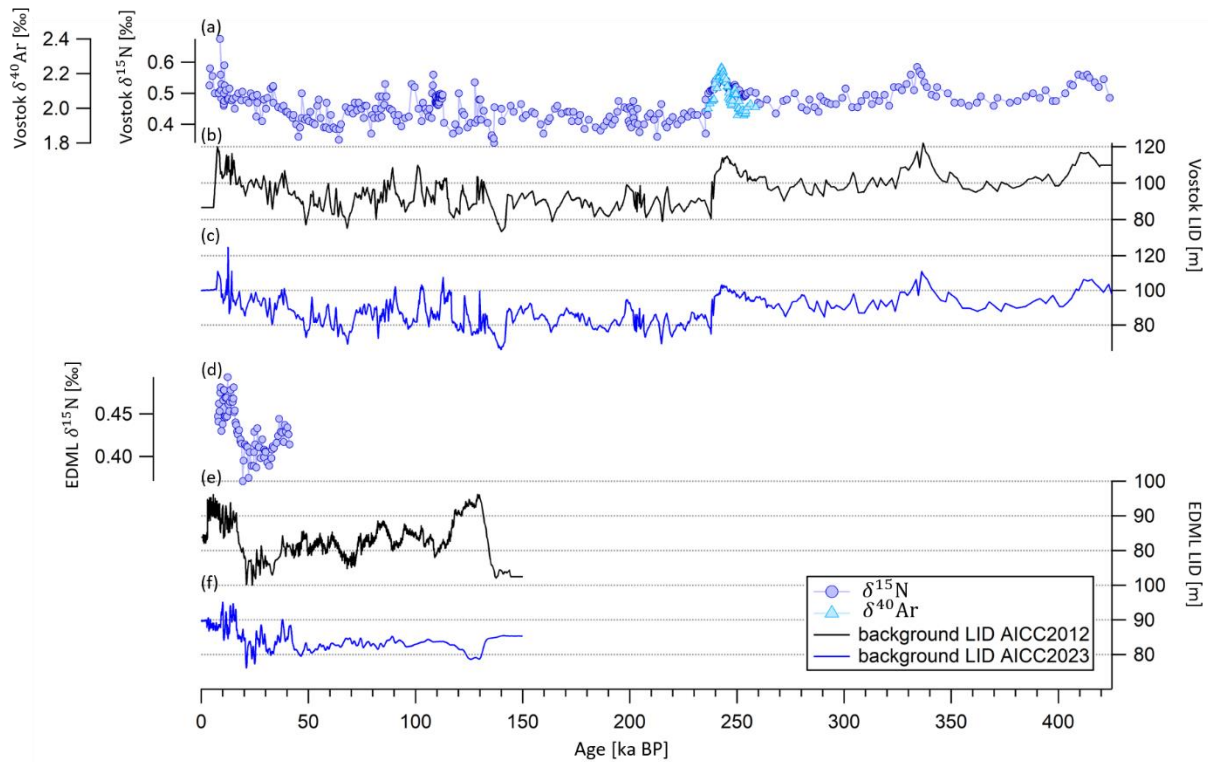

264 **Figure S11. Records of  $\delta^{40}\text{Ar}$  and  $\delta^{15}\text{N}$  and LID scenarios at Vostok and EDML.** (a)  $\delta^{40}\text{Ar}$  and  $\delta^{15}\text{N}$  records of Vostok ice  
 265 core (Sowers et al., 1992; Caillon et al., 2003) and (d)  $\delta^{15}\text{N}$  record of EDML ice core (Landais et al., 2006) on AICC2023 age  
 266 scale. (b) Background LID at Vostok and (e) EDML used to constrain AICC2012 (Bazin et al. 2013). (c) Background LID at  
 267 Vostok and (f) EDML used to constrain AICC2023 (this study).

268 Such modifications of the background LID scenarios have a negligible impact on the new AICC2023  
 269 chronology. Indeed, choosing the scenarios described in this section for EDML and Vostok rather than the  
 270 scenarios that were used to constrain AICC2012 induces maximum age shifts of 200 and 350 years in the  
 271 chronology of EDML and Vostok ice cores respectively, which is minor considering the chronological uncertainty  
 272 of several hundreds of years.

273

274

275

276

277

278

279

280

281

282

283 **4.2.3 Background scenarios and relative errors for the construction of AICC2023**

284 With respect to the AICC2012 chronology, the background LID scenarios for EDC, Vostok, EDML and  
 285 TALDICE ice cores are revised in AICC2023 (Table S8). We also reduce the background relative uncertainties  
 286 associated with the LID, thinning and accumulation functions at the five sites (see Sect. 3.2 in the Supplementary  
 287 Material).

288 **Table S8. Origin of the background scenarios of LID, thinning and accumulation for EDC, EDML, Vostok, TALDICE**  
 289 **and NGRIP and associated relative errors used in AICC2023.** The LID prior relative uncertainty is set between 0.1 or 0.2  
 290 whether  $\delta^{15}\text{N}$  data are available or not. The mention ‘‘AICC2012’’ means that the scenario is the same than in AICC2012 (Bazin  
 291 et al., 2013).

|                | LID                                                          |                             | Thinning |                      | Accumulation |                        |
|----------------|--------------------------------------------------------------|-----------------------------|----------|----------------------|--------------|------------------------|
|                | Scenario                                                     | Relative error              | Scenario | Relative error       | Scenario     | Relative error         |
| <b>EDC</b>     | $\delta^{15}\text{N}$                                        | 0.1 (data)                  | AICC2012 | Linear from 0 to 0.5 | AICC2012     | 0.2                    |
|                | Firn model                                                   | 0.2 (no data)               |          |                      |              |                        |
| <b>EDML</b>    | $\delta^{15}\text{N}$                                        | 0.1 (data)                  | AICC2012 | Linear from 0 to 1   | AICC2012     | 0.2                    |
|                | Firn model                                                   | 0.2 (no data)               |          |                      |              |                        |
| <b>Vostok</b>  | $\delta^{15}\text{N}, \delta^{40}\text{Ar}$                  | 0.1 (data)<br>0.2 (no data) | AICC2012 | Linear from 0 to 0.5 | AICC2012     | Linear from 0.2 to 0.7 |
| <b>TALDICE</b> | TALDICE-deep1 (Crotti et al., 2021)<br>$\delta^{15}\text{N}$ | 0.2                         | AICC2012 | Linear from 0 to 1   | AICC2012     | 0.2                    |
| <b>NGRIP</b>   | AICC2012 (Firn model)                                        | 0.2                         | AICC2012 | Linear from 0 to 0.5 | AICC2012     | 0.2                    |

292

293 **4.3 The new AICC2023 age scale over the last 120 kyr**

294 With respect to the AICC2012 chronology, new stratigraphic links between ice and gas series are used to constrain  
 295 AICC2023 over the past 120 kyr. They include tie points between  $\text{CH}_4$  series from EDC, EDML, Vostok,  
 296 TALDICE and NGRIP ice cores (Baumgartner et al., 2014) as well as volcanic matching points between EDC,  
 297 EDML and NGRIP ice cores (Svensson et al., 2020) (Fig. S12). The gas stratigraphic links used to construct  
 298 AICC2012 over the last glacial period come from matching  $\text{CH}_4$  and  $\delta^{18}\text{O}_{\text{atm}}$  variations between ice cores. Still, an  
 299 offset of several centuries is observed between Antarctic and Greenland  $\text{CH}_4$  records during the rapid increases  
 300 associated with Dansgaard-Oeschger (D-O) events in AICC2012 (Fig. S12). Baumgartner et al. (2014)  
 301 substantially extended the NGRIP  $\text{CH}_4$  dataset and provided accurate tie points between NGRIP, EDML, EDC,  
 302 Vostok and TALDICE  $\text{CH}_4$  records. By implementing these new gas stratigraphic links in AICC2023, we improve  
 303 the alignment between the  $\text{CH}_4$  records by several centuries, up to 500 and 840 years for the North Atlantic abrupt  
 304 warming associated with D-O 5 and 18 respectively.



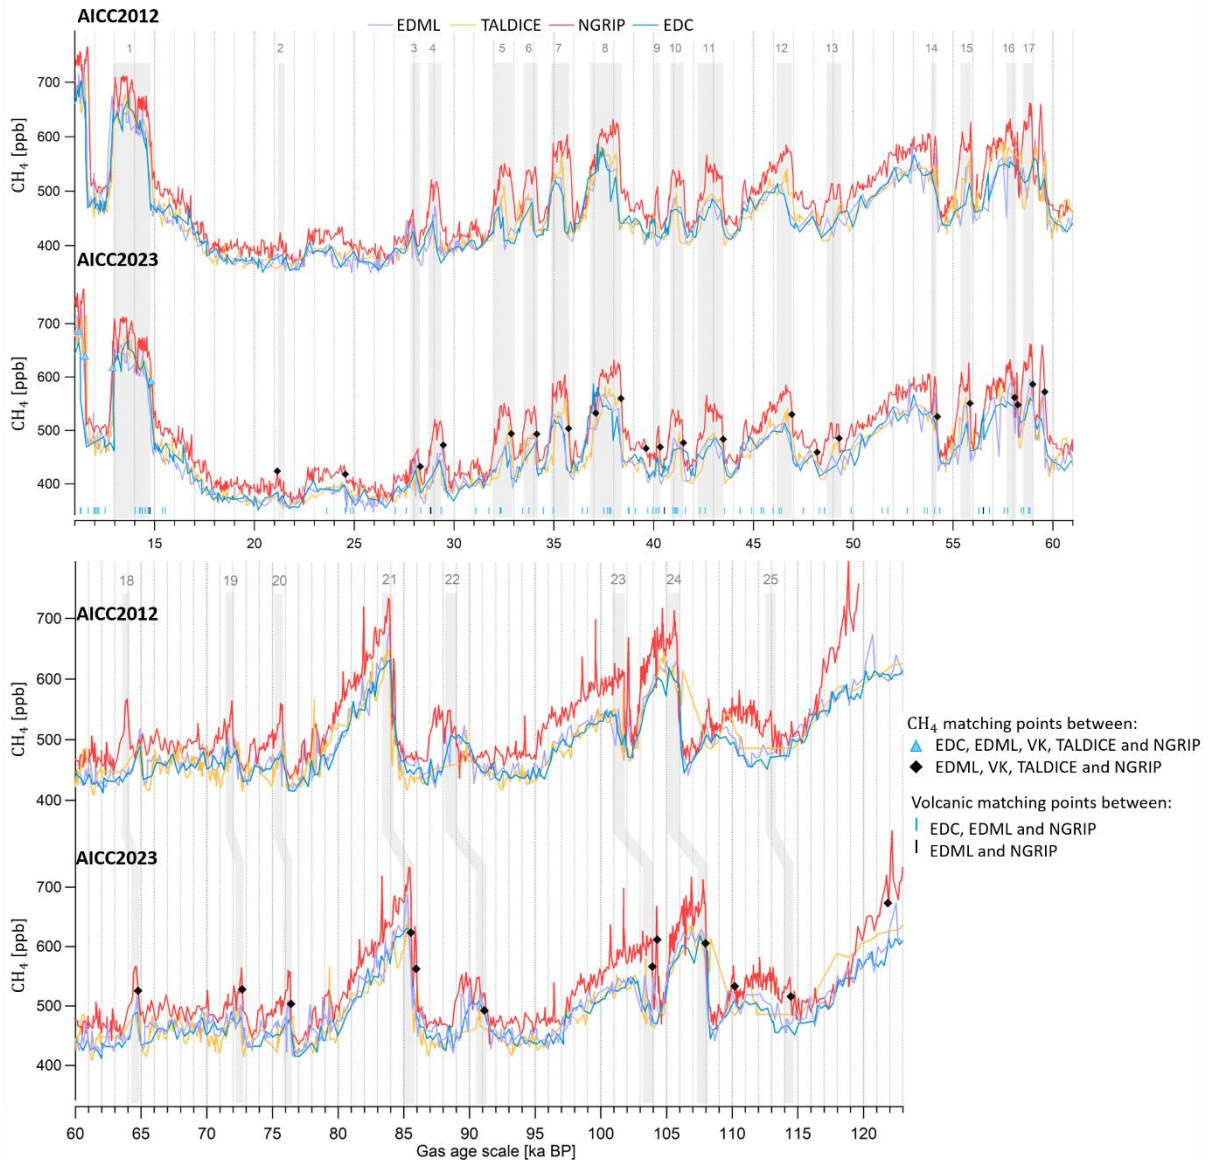

305 **Figure S12. CH<sub>4</sub> records from Antarctic and NGRIP sites over the last 122 kyr.** CH<sub>4</sub> from EDML, TALDICE, NGRIP and  
 306 EDC ice cores on the AICC2012 gas timescale (top panel). CH<sub>4</sub> from EDML, TALDICE, NGRIP and EDC ice cores on the  
 307 AICC2023 gas timescale (bottom panel). Stratigraphic links between CH<sub>4</sub> series from EDC, EDML, Vostok, TALDICE and  
 308 NGRIP ice cores (blue triangles and black squares, Baumgartner et al., 2014) and between volcanic sulfate patterns from EDC,  
 309 EDML and NGRIP ice cores (vertical bars, Svensson et al., 2020) are used to constrain AICC2023 over the last 122 kyr. Abrupt  
 310 D-O events are shown by grey rectangles and numbered from the youngest to the oldest (1-25) (Barbante et al., 2006).

311

312

313

314

315

316

317

318 **4.4 The new AICC2023 age scale for EDC over the last 800 kyr**

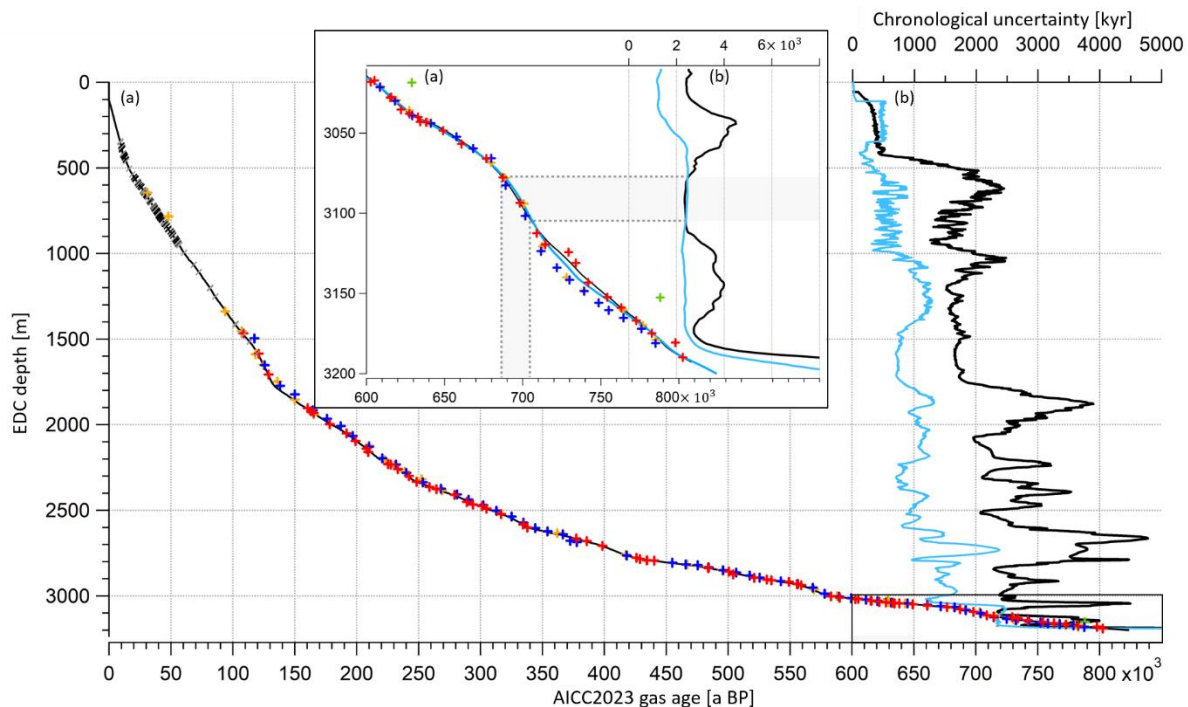

319 **Figure S13. EDC gas age and uncertainty as a function of the depth.** (a) EDC gas age (AICC2012 in black, AICC2023 in  
320 blue). (b)  $1\sigma$  uncertainty (AICC2012 in black, AICC2023 in blue). Crosses and slashes represent new age constraints (ice  
321 stratigraphic links in black, gas stratigraphic links in grey,  $\delta^{18}\text{O}_{\text{atm}}$  in red,  $\delta\text{O}_2/\text{N}_2$  in blue, TAC in orange,  $^{81}\text{Kr}$  in green). Inset  
322 is a zoom in between 800 and 600 ka BP. Grey rectangles frame periods where the new AICC2023 uncertainty is larger than  
323 AICC2012 uncertainty.

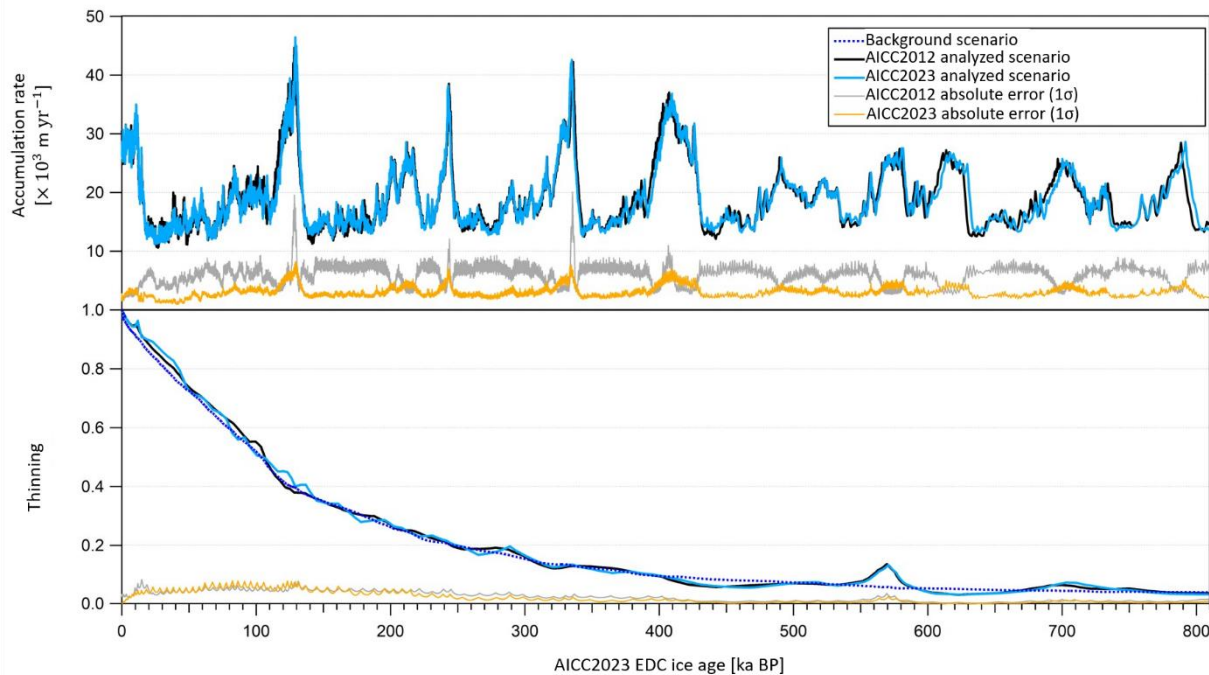

324 **Figure S14. Analyzed accumulation and thinning functions for EDC over the last 800 kyr.** They are provided by AICC2012  
325 and AICC2023 (black and blue plain lines respectively) along with their absolute uncertainties (gray and yellow respectively).  
326 The background thinning function is the same for AICC2012 and AICC2023 (dark blue dotted line).

328 **References**

- 329 Barbante, C., Barnola, J.-M., Becagli, S., Beer, J., Bigler, M., Boutron, C., Blunier, T., Castellano, E., Cattani, O.,  
 330 Chappellaz, J., Dahl-Jensen, D., Debret, M., Delmonte, B., Dick, D., Falourd, S., Faria, S., Federer, U., Fischer,  
 331 H., Freitag, J., Frenzel, A., Fritzsche, D., Fundel, F., Gabrielli, P., Gaspari, V., Gersonde, R., Graf, W., Grigoriev,  
 332 D., Hamann, I., Hansson, M., Hoffmann, G., Hutterli, M. A., Huybrechts, P., Isaksson, E., Johnsen, S., Jouzel, J.,  
 333 Kaczmarek, M., Karlin, T., Kaufmann, P., Kipfstuhl, S., Kohno, M., Lambert, F., Lambrecht, A., Lambrecht, A.,  
 334 Landais, A., Lawer, G., Leuenberger, M., Littot, G., Loulergue, L., Lüthi, D., Maggi, V., Marino, F., Masson-  
 335 Delmotte, V., Meyer, H., Miller, H., Mulvaney, R., Narcisi, B., Oerlemans, J., Oerter, H., Parrenin, F., Petit, J.-R.,  
 336 Raisbeck, G., Raynaud, D., Röthlisberger, R., Ruth, U., Rybak, O., Severi, M., Schmitt, J., Schwander, J.,  
 337 Siegenthaler, U., Siggaard-Andersen, M.-L., Spahni, R., Steffensen, J. P., Stenni, B., Stocker, T. F., Tison, J.-L.,  
 338 Traversi, R., Udisti, R., Valero-Delgado, F., van den Broeke, M. R., van de Wal, R. S. W., Wagenbach, D., Wegner,  
 339 A., Weiler, K., Wilhelms, F., Winther, J.-G., Wolff, E., and Members, E. C.: One-to-one coupling of glacial climate  
 340 variability in Greenland and Antarctica, *Nature*, 444, 195–198, DOI:10.1038/nature05301, 2006.
- 341 Barker, S., Knorr, G., Conn, S., Lordsmith, S., Newman, D., & Thornalley, D.: Early interglacial legacy of  
 342 deglacial climate instability, *Paleoceanogr. Paleoclimatol.*, 34, 1455-1475, DOI:10.1029/2019PA003661, 2019.
- 343 Barker, S., Zhang, X., Jonkers, L., Lordsmith, S., Conn, S., & Knorr, G.: Strengthening Atlantic inflow across the  
 344 mid-Pleistocene transition, *Paleoceanogr. Paleoclimatol.*, 36, DOI:10.1029/2020PA004200, 2021.
- 345 Baumgartner, M., Kindler, P., Eicher, O., Floch, G., Schilt, A., Schwander, J., Spahni, R., Capron, E., Chappellaz,  
 346 J., Leuenberger, M., Fischer, H., and Stocker, T. F.: NGRIP CH<sub>4</sub> concentration from 120 to 10 kyr before present  
 347 and its relation to a  $\delta^{15}\text{N}$  temperature reconstruction from the same ice core, *Clim. Past*, 10, 903–920,  
 348 DOI:10.5194/CP-10-903-2014, 2014.
- 349 Bazin, L., Landais, A., Lemieux-Dudon, B., Toyé Mahamadou Kele, H., Veres, D., Parrenin, F., Martinerie, P.,  
 350 Ritz, C., Capron, E., Lipenkov, V., Loutre, M.-F., Raynaud, D., Vinther, B., Svensson, A., Rasmussen, S. O.,  
 351 Severi, M., Blunier, T., Leuenberger, M., Fischer, H., Masson-Delmotte, V., Chappellaz, J., and Wolff, E.: An  
 352 optimized multi-proxy, multi-site Antarctic ice and gas orbital chronology (AICC2012): 120–800 ka, *Clim. Past*,  
 353 9, 1715–1731, DOI:10.5194/cp-9-1715-2013, 2013.
- 354 Bazin, L., Landais, A., Capron, E., Masson-Delmotte, V., Ritz, C., Picard, G., Jouzel, J., Dumont, M., Leuenberger,  
 355 M., and Prié, F.: Phase relationships between orbital forcing and the composition of air trapped in Antarctic ice  
 356 cores, *Clim. Past*, 12, 729–748, DOI:10.5194/cp-12-729-2016, 2016.
- 357 Bréant, C., Martinerie, P., Orsi, A., Arnaud, L., and Landais, A.: Modelling firn thickness evolution during the last  
 358 deglaciation: constraints on sensitivity to temperature and impurities, *Clim. Past*, 13, 833–853, DOI:10.5194/cp-  
 359 13-833-2017, 2017.
- 360 Buizert, C.: The Ice Core Gas Age-Ice Age Difference as a Proxy for Surface Temperature, *Geophys. Res. Lett.*,  
 361 48, e2021GL094241, DOI:10.1029/2021GL094241, 2021.
- 362 Caillon, N., Jouzel, J., Severinghaus, J. P., Chappellaz, J., and Blunier, T.: A novel method to study the phase  
 363 relationship between Antarctic and Greenland climate, *Geophys. Res. Lett.*, 30, DOI:10.1029/2003GL017838,  
 364 2003.
- 365 Crotti, I., Landais, A., Stenni, B., Bazin, L., Parrenin, F., Frezzotti, M., Ritterbusch, F., Lu, Z. T., Jiang, W., Yang,  
 366 G. M., Fourré, E., Orsi, A., Jacob, R., Minster, B., Prié, F., Dreossi, G., and Barbante, C.: An extension of the  
 367 TALDICE ice core age scale reaching back to MIS 10.1, *Quat. Sci. Rev.*, 266, 107078,  
 368 DOI:10.1016/J.QUASCIREV.2021.107078, 2021.
- 369 Dreyfus, G. B., Parrenin, F., Lemieux-Dudon, B., Durand, G., Masson-Delmotte, V., Jouzel, J., Barnola, J. M.,  
 370 Panno, L., Spahni, R., Tisserand, A., Siegenthaler, U., and Leuenberger, M.: Anomalous flow below 2700 m in

371 the EPICA Dome C ice core detected using  $\delta^{18}\text{O}$  of atmospheric oxygen measurements, *Clim. Past*, 3, 341–353,  
372 DOI:10.5194/CP-3-341-2007, 2007.

373 Extier, T., Landais, A., Bréant, C., Prié, F., Bazin, L., Dreyfus, G., Roche, D. M., and Leuenberger, M.: On the  
374 use of  $\delta^{18}\text{O}_{\text{atm}}$  for ice core dating, *Quat. Sci. Rev.*, 185, 244–257, DOI:10.1016/J.QUASCIREV.2018.02.008,  
375 2018a.

376 Extier, T., Landais, A., Bréant, C., Prié, F., Bazin, L., Dreyfus, G., Roche, D. M., and Leuenberger, M. C.:  $\delta\text{O}_2/\text{N}_2$   
377 records between 100–800 ka from EPICA Dome C ice core, *PANGAEA*, DOI:10.1594/PANGAEA.887326,  
378 2018b.

379 Landais, A., Barnola, J.M., Kawamura, K., Caillon, N., Delmotte, M., Van Ommen, T., Dreyfus, G., Jouzel, J.,  
380 Masson-Delmotte, V., Minster, B., Freitag, J., Leuenberger, M., Schwander, J., Huber, C., Etheridge, D. and  
381 Morgan, V., Firn-air  $\delta^{15}\text{N}$  in modern polar sites and glacial–interglacial ice: a model-data mismatch during glacial  
382 periods in Antarctica?, *Quat. Sci. Rev.*, 25, 49–62, DOI:10.1016/j.quascirev.2005.06.007, 2006.

383 Landais, A., Dreyfus, G., Capron, E., Pol, K., Loutre, M. F., Raynaud, D., Lipenkov, V. Y., Arnaud, L., Masson-  
384 Delmotte, V., Paillard, D., Jouzel, J., and Leuenberger, M.: Towards orbital dating of the EPICA Dome C ice core  
385 using  $\delta\text{O}_2/\text{N}_2$ , *Clim. Past*, 8, 191–203, DOI:10.5194/CP-8-191-2012, 2012.

386 Laskar, J., Robutel, P., Joutel, F., Gastineau, M., Correia, A. C. M., and Levrard, B.: A long-term numerical  
387 solution for the insolation quantities of the Earth, *Astron. Astrophys.*, 428, 261–285, DOI:10.1051/0004-  
388 6361:20041335, 2004.

389 Oyabu, I., Kawamura, K., Uchida, T., Fujita, S., Kitamura, K., Hirabayashi, M., Aoki, S., Morimoto, S., Nakazawa,  
390 T., Severinghaus, J. P., and Morgan, J. D.: Fractionation of  $\text{O}_2/\text{N}_2$  and  $\text{Ar}/\text{N}_2$  in the Antarctic ice sheet during  
391 bubble formation and bubble–clathrate hydrate transition from precise gas measurements of the Dome Fuji ice  
392 core, *Cryosphere*, 15, 5529–5555, DOI:10.5194/tc-15-5529-2021, 2021.

393 Oyabu, I., Kawamura, K., Buizert, C., Parrenin, F., Orsi, A., Kitamura, K., Aoki, S., and Nakazawa, T.: The Dome  
394 Fuji ice core DF2021 chronology (0–207 kyr BP), *Quat. Sci. Rev.*, 294, 107754,  
395 DOI:10.1016/J.QUASCIREV.2022.107754, 2022.

396 Parrenin, F., Rémy, F., Ritz, C., Siebert, M. J., and Jouzel, J.: New modeling of the Vostok ice flow line and  
397 implication for the glaciological chronology of the Vostok ice core, *J. Geophys. Res. Atmos.*, 109, D20102,  
398 DOI:10.1029/2004JD004561, 2004.

399 Parrenin, F., Dreyfus, G., Durand, G., Fujita, S., Gagliardini, O., Gillet, F., Jouze, J., Kawamura, K., Lhomme, N.,  
400 Masson-Delmotte, V., Ritz, C., Schwander, J., Shoji, H., Uemura, R., Watanabe, O., and Yoshida, N.: 1-D-ice  
401 flow modelling at EPICA Dome C and Dome Fuji, East Antarctica, *Clim. Past*, 3, 243–259, DOI:10.5194/CP-3-  
402 243-2007, 2007.

403 Parrenin, F., Barker, S., Blunier, T., Chappellaz, J., Jouzel, J., Landais, A., Masson-Delmotte, V., Schwander, J.,  
404 and Veres, D.: On the gas-ice depth difference ( $\Delta\text{depth}$ ) along the EPICA Dome C ice core, *Clim. Past*, 8, 1239–  
405 1255, DOI:10.5194/CP-8-1239-2012, 2012.

406 Petit, J. R., Jouzel, J., Raynaud, D., Barkov, N. I., Barnola, J. M., Basile, I., Bender, M., Chappellaz, J., Davis, M.,  
407 Delaygue, G., Delmotte, M., Kotiyakov, V. M., Legrand, M., Lipenkov, V. Y., Lorius, C., Pépin, L., Ritz, C.,  
408 Saltzman, E., and Stievenard, M.: Climate and atmospheric history of the past 420,000 years from the Vostok ice  
409 core, Antarctica, *Nature*, 399, 429–436, DOI:10.1038/20859, 1999.

410 Sowers, T., Bender, M., Raynaud, D., and Korotkevich, Y. S.:  $\delta^{15}\text{N}$  of  $\text{N}_2$  in air trapped in polar ice: A tracer of  
411 gas transport in the firn and a possible constraint on ice age–gas age differences, *J. Geophys. Res. Atmos.*, 97,  
412 15683–15697, DOI:10.1029/92JD01297, 1992.

413 Svensson, A., Dahl-Jensen, D., Steffensen, J. P., Blunier, T., Rasmussen, S. O., Vinther, B. M., Vallenga, P.,  
414 Capron, E., Gkinis, V., Cook, E., Kjær, H. A., Muscheler, R., Kipfstuhl, S., Wilhelms, F., Stocker, T. F., Fischer,  
415 H., Adolphi, F., Erhardt, T., Sigl, M., Landais, A., Parrenin, F., Buizert, C., McConnell, J. R., Severi, M.,

416 Mulvaney, R., and Bigler, M.: Bipolar volcanic synchronization of abrupt climate change in Greenland and  
417 Antarctic ice cores during the last glacial period, *Clim. Past*, 16, 1565–1580, DOI:10.5194/cp-16-1565-2020, 2020.
